# Supplementary material for: PEMA: a flexible Pipeline for Environmental DNA Metabarcoding Analysis of the 16S/18S ribosomal RNA, ITS, and COI marker genes
Source: PubMed Central journal article supplement (PMC7066391; doi:10.1093/gigascience/giaa022), 2020-03-12
Supplement: giaa022_giga-d-19-00397_original_submission.pdf [file giaa022_giga-d-19-00397_original_submission.pdf]

## PEMA: a flexible Pipeline for Environmental DNA Metabarcoding Analysis of the 16S/18S rRNA, ITS and COI marker genes --Manuscript Draft--

|                                                      |                                                                                                                                                                                                                                                                                                                                                                                                                                                                                                                                                                                                                                                                                                                                                                                                                                                                                                                                                                                                                                                                                                                                                                                                                                                                                                                                                                                                                                                                                                                                                                                                                                                                                                                                                                                                                                                                                                                                                                                                                                                                                                                                                                                                     |                      |
|------------------------------------------------------|-----------------------------------------------------------------------------------------------------------------------------------------------------------------------------------------------------------------------------------------------------------------------------------------------------------------------------------------------------------------------------------------------------------------------------------------------------------------------------------------------------------------------------------------------------------------------------------------------------------------------------------------------------------------------------------------------------------------------------------------------------------------------------------------------------------------------------------------------------------------------------------------------------------------------------------------------------------------------------------------------------------------------------------------------------------------------------------------------------------------------------------------------------------------------------------------------------------------------------------------------------------------------------------------------------------------------------------------------------------------------------------------------------------------------------------------------------------------------------------------------------------------------------------------------------------------------------------------------------------------------------------------------------------------------------------------------------------------------------------------------------------------------------------------------------------------------------------------------------------------------------------------------------------------------------------------------------------------------------------------------------------------------------------------------------------------------------------------------------------------------------------------------------------------------------------------------------|----------------------|
| <b>Manuscript Number:</b>                            | GIGA-D-19-00397                                                                                                                                                                                                                                                                                                                                                                                                                                                                                                                                                                                                                                                                                                                                                                                                                                                                                                                                                                                                                                                                                                                                                                                                                                                                                                                                                                                                                                                                                                                                                                                                                                                                                                                                                                                                                                                                                                                                                                                                                                                                                                                                                                                     |                      |
| <b>Full Title:</b>                                   | PEMA: a flexible Pipeline for Environmental DNA Metabarcoding Analysis of the 16S/18S rRNA, ITS and COI marker genes                                                                                                                                                                                                                                                                                                                                                                                                                                                                                                                                                                                                                                                                                                                                                                                                                                                                                                                                                                                                                                                                                                                                                                                                                                                                                                                                                                                                                                                                                                                                                                                                                                                                                                                                                                                                                                                                                                                                                                                                                                                                                |                      |
| <b>Article Type:</b>                                 | Technical Note                                                                                                                                                                                                                                                                                                                                                                                                                                                                                                                                                                                                                                                                                                                                                                                                                                                                                                                                                                                                                                                                                                                                                                                                                                                                                                                                                                                                                                                                                                                                                                                                                                                                                                                                                                                                                                                                                                                                                                                                                                                                                                                                                                                      |                      |
| <b>Funding Information:</b>                          | General Secretariat for Research and Technology (241)                                                                                                                                                                                                                                                                                                                                                                                                                                                                                                                                                                                                                                                                                                                                                                                                                                                                                                                                                                                                                                                                                                                                                                                                                                                                                                                                                                                                                                                                                                                                                                                                                                                                                                                                                                                                                                                                                                                                                                                                                                                                                                                                               | Dr Evangelos Pafilis |
| <b>Abstract:</b>                                     | <p>Background: Environmental DNA (eDNA) and metabarcoding allow the identification of a mixture of species individuals and launch a new era in bio- and eco-assessment. A great number of steps are required to obtain taxonomically assigned matrices from raw data. For most of these, a plethora of tools are available; each tool's execution parameters need to be tailored to reflect each experiment's idiosyncrasy. Adding to this complexity, the computation capacity of High Performance Computing systems is frequently required for such analyses. To address the aforementioned difficulties, bioinformatic pipelines need to combine state-of-the art technologies and algorithms with an easy to get-set-use framework, allowing researchers to tune each study. Software containerization technologies ease the sharing and running of software packages across operating systems; thus, they strongly facilitate pipeline development and usage. Likewise are programming languages specialized for big data pipelines, incorporating features like roll-back checkpoints and on-demand partial pipeline execution.</p> <p>Findings: PEMA is a containerized assembly of key metabarcoding analysis tools with a low effort in setting up, running and customizing to researchers' needs. Based on third party tools, PEMA performs read pre-processing, (M)OTUs clustering, ASV inference, and taxonomy assignment for 16S and 18S rRNA as well as ITS and COI marker gene data. Due to its simplified parameterisation and checkpoint support, PEMA allows users to explore alternative algorithms for specific steps of the pipeline without the need of a complete re-execution. PEMA was evaluated against both mock communities and previously published datasets and achieved comparable quality results.</p> <p>Conclusions: An HPC-based approach was used to develop PEMA, however it can be used in personal computers as well. Given its time-efficient performance and its quality results, it is suggested that PEMA can be used for accurate eDNA metabarcoding analysis, thus enhancing the applicability of next-generation biodiversity assessment studies.</p> |                      |
| <b>Corresponding Author:</b>                         | Haris Zafeiropoulos<br>Hellenic Centre for Marine Research<br>Heraklion, Irakleio GREECE                                                                                                                                                                                                                                                                                                                                                                                                                                                                                                                                                                                                                                                                                                                                                                                                                                                                                                                                                                                                                                                                                                                                                                                                                                                                                                                                                                                                                                                                                                                                                                                                                                                                                                                                                                                                                                                                                                                                                                                                                                                                                                            |                      |
| <b>Corresponding Author Secondary Information:</b>   |                                                                                                                                                                                                                                                                                                                                                                                                                                                                                                                                                                                                                                                                                                                                                                                                                                                                                                                                                                                                                                                                                                                                                                                                                                                                                                                                                                                                                                                                                                                                                                                                                                                                                                                                                                                                                                                                                                                                                                                                                                                                                                                                                                                                     |                      |
| <b>Corresponding Author's Institution:</b>           | Hellenic Centre for Marine Research                                                                                                                                                                                                                                                                                                                                                                                                                                                                                                                                                                                                                                                                                                                                                                                                                                                                                                                                                                                                                                                                                                                                                                                                                                                                                                                                                                                                                                                                                                                                                                                                                                                                                                                                                                                                                                                                                                                                                                                                                                                                                                                                                                 |                      |
| <b>Corresponding Author's Secondary Institution:</b> |                                                                                                                                                                                                                                                                                                                                                                                                                                                                                                                                                                                                                                                                                                                                                                                                                                                                                                                                                                                                                                                                                                                                                                                                                                                                                                                                                                                                                                                                                                                                                                                                                                                                                                                                                                                                                                                                                                                                                                                                                                                                                                                                                                                                     |                      |
| <b>First Author:</b>                                 | Haris Zafeiropoulos                                                                                                                                                                                                                                                                                                                                                                                                                                                                                                                                                                                                                                                                                                                                                                                                                                                                                                                                                                                                                                                                                                                                                                                                                                                                                                                                                                                                                                                                                                                                                                                                                                                                                                                                                                                                                                                                                                                                                                                                                                                                                                                                                                                 |                      |
| <b>First Author Secondary Information:</b>           |                                                                                                                                                                                                                                                                                                                                                                                                                                                                                                                                                                                                                                                                                                                                                                                                                                                                                                                                                                                                                                                                                                                                                                                                                                                                                                                                                                                                                                                                                                                                                                                                                                                                                                                                                                                                                                                                                                                                                                                                                                                                                                                                                                                                     |                      |
| <b>Order of Authors:</b>                             | Haris Zafeiropoulos                                                                                                                                                                                                                                                                                                                                                                                                                                                                                                                                                                                                                                                                                                                                                                                                                                                                                                                                                                                                                                                                                                                                                                                                                                                                                                                                                                                                                                                                                                                                                                                                                                                                                                                                                                                                                                                                                                                                                                                                                                                                                                                                                                                 |                      |
|                                                      | Viet Ha Quoc                                                                                                                                                                                                                                                                                                                                                                                                                                                                                                                                                                                                                                                                                                                                                                                                                                                                                                                                                                                                                                                                                                                                                                                                                                                                                                                                                                                                                                                                                                                                                                                                                                                                                                                                                                                                                                                                                                                                                                                                                                                                                                                                                                                        |                      |
|                                                      | Katerina Vasileiadou                                                                                                                                                                                                                                                                                                                                                                                                                                                                                                                                                                                                                                                                                                                                                                                                                                                                                                                                                                                                                                                                                                                                                                                                                                                                                                                                                                                                                                                                                                                                                                                                                                                                                                                                                                                                                                                                                                                                                                                                                                                                                                                                                                                |                      |
|                                                      | Antonis Potirakis                                                                                                                                                                                                                                                                                                                                                                                                                                                                                                                                                                                                                                                                                                                                                                                                                                                                                                                                                                                                                                                                                                                                                                                                                                                                                                                                                                                                                                                                                                                                                                                                                                                                                                                                                                                                                                                                                                                                                                                                                                                                                                                                                                                   |                      |

|                                                                                                                                                                                                                                                                                                                                                                                                                                                                                                                                     |                      |
|-------------------------------------------------------------------------------------------------------------------------------------------------------------------------------------------------------------------------------------------------------------------------------------------------------------------------------------------------------------------------------------------------------------------------------------------------------------------------------------------------------------------------------------|----------------------|
|                                                                                                                                                                                                                                                                                                                                                                                                                                                                                                                                     | Christos Arvanitidis |
|                                                                                                                                                                                                                                                                                                                                                                                                                                                                                                                                     | Pantelis Topalis     |
|                                                                                                                                                                                                                                                                                                                                                                                                                                                                                                                                     | Christina Pavlodi    |
|                                                                                                                                                                                                                                                                                                                                                                                                                                                                                                                                     | Evangelos Pafilis    |
| <b>Order of Authors Secondary Information:</b>                                                                                                                                                                                                                                                                                                                                                                                                                                                                                      |                      |
| <b>Additional Information:</b>                                                                                                                                                                                                                                                                                                                                                                                                                                                                                                      |                      |
| <b>Question</b>                                                                                                                                                                                                                                                                                                                                                                                                                                                                                                                     | <b>Response</b>      |
| Are you submitting this manuscript to a special series or article collection?                                                                                                                                                                                                                                                                                                                                                                                                                                                       | No                   |
| <p><b>Experimental design and statistics</b></p> <p>Full details of the experimental design and statistical methods used should be given in the Methods section, as detailed in our <a href="#">Minimum Standards Reporting Checklist</a>. Information essential to interpreting the data presented should be made available in the figure legends.</p> <p>Have you included all the information requested in your manuscript?</p>                                                                                                  | Yes                  |
| <p><b>Resources</b></p> <p>A description of all resources used, including antibodies, cell lines, animals and software tools, with enough information to allow them to be uniquely identified, should be included in the Methods section. Authors are strongly encouraged to cite <a href="#">Research Resource Identifiers</a> (RRIDs) for antibodies, model organisms and tools, where possible.</p> <p>Have you included the information requested as detailed in our <a href="#">Minimum Standards Reporting Checklist</a>?</p> | Yes                  |
| <p><b>Availability of data and materials</b></p> <p>All datasets and code on which the conclusions of the paper rely must be either included in your submission or</p>                                                                                                                                                                                                                                                                                                                                                              | Yes                  |

deposited in [publicly available repositories](#) (where available and ethically appropriate), referencing such data using a unique identifier in the references and in the “Availability of Data and Materials” section of your manuscript.

Have you have met the above requirement as detailed in our [Minimum Standards Reporting Checklist](#)?

1 **PEMA: a flexible Pipeline for Environmental DNA Metabarcoding Analysis of the 16S/18S rRNA,**

2 **ITS and COI marker genes**

3

4 Haris Zafeiropoulos\*

5 *Institute of Marine Biology, Biotechnology and Aquaculture (IMBBC), Hellenic Centre for Marine*

6 *Research (HCMR), Heraklion, Greece*

7 *e-mail: [haris-zaf@hcmr.gr](mailto:haris-zaf@hcmr.gr)*

8 **\* Corresponding author**

9

10 Ha Quoc Viet

11 *Institute of Marine Biology, Biotechnology and Aquaculture (IMBBC), Hellenic Centre for Marine*

12 *Research (HCMR), Heraklion, Greece*

13 *e-mail: [qvha@free.fr](mailto:qvha@free.fr)*

14

15 Katerina Vasileiadou

16 *Charles University, Prague, Czech Republic*

17 *Institute of Marine Biology, Biotechnology and Aquaculture (IMBBC), Hellenic Centre for Marine*

18 *Research (HCMR), Heraklion, Greece*

19 *e-mail: [kvasileiadou@hcmr.gr](mailto:kvasileiadou@hcmr.gr)*

20

21 Antonis Potirakis

22 *Institute of Marine Biology, Biotechnology and Aquaculture (IMBBC), Hellenic Centre for Marine*

23 *Research (HCMR), Heraklion, Greece*

24 *e-mail: [potant@hcmr.gr](mailto:potant@hcmr.gr)*

25

26 Christos Arvanitidis

27 *Institute of Marine Biology, Biotechnology and Aquaculture (IMBBC), Hellenic Centre for Marine*

28 *Research (HCMR), Heraklion, Greece*

29 *e-mail: [arvanitidis@hcmr.gr](mailto:arvanitidis@hcmr.gr)*

30

31 Pantelis Topalis

32 *Institute of Molecular Biology and Biotechnology (IMBB), Foundation for Research and Technology*

33 *(FORTH), Heraklion, Greece*

34 *e-mail: [topalis@imbb.forth.gr](mailto:topalis@imbb.forth.gr)*

35

36 Christina Pavloudi

37 *Institute of Marine Biology, Biotechnology and Aquaculture (IMBBC), Hellenic Centre for Marine*

38 *Research (HCMR), Heraklion, Greece*

39 *e-mail: [cpavloud@hcmr.gr](mailto:cpavloud@hcmr.gr)*

40

41 Evangelos Pafilis

42 *Institute of Marine Biology, Biotechnology and Aquaculture (IMBBC), Hellenic Centre for Marine*

43 *Research (HCMR), Heraklion, Greece*

44 *e-mail: [pafilis@hcmr.gr](mailto:pafilis@hcmr.gr)*

45

## 46 **Abstract**

47 **Background:** Environmental DNA (eDNA) and metabarcoding allow the identification of a mixture of  
48 **species** individuals and launch a new era in bio- and eco-assessment. A **great** number of steps are required  
49 to obtain taxonomically assigned **matrices** from raw data. For most of these, a plethora of tools are  
50 available; each tool's execution parameters need to be tailored to reflect each experiment's idiosyncrasy.  
51 Adding to this complexity, the computation capacity of High Performance Computing systems is  
52 frequently required for such analyses. **To address the aforementioned difficulties, bioinformatic pipelines**  
53 **need to combine state-of-the art technologies and algorithms with an easy to get-set-use framework,**  
54 **allowing researchers to tune each study.** Software containerization technologies ease the sharing and

55 running of software packages across operating systems; thus, they strongly facilitate pipeline development  
56 and usage. Likewise are programming languages specialized for big data pipelines, incorporating features  
57 like roll-back checkpoints and on-demand partial pipeline execution.

58 **Findings:** PEMA is a containerized assembly of key metabarcoding analysis tools with a low effort in  
59 setting up, running and customizing to researchers' needs. Based on third party tools, PEMA performs  
60 read pre-processing, (M)OTUs clustering, [ASV inference](#), and taxonomy assignment for 16S [and 18S](#)  
61 [rRNA](#) as well as [ITS and COI](#) marker gene data. Due to its simplified parameterisation and checkpoint  
62 support, PEMA allows users to explore alternative algorithms for specific steps of the pipeline without the  
63 need of a complete re-execution. PEMA [was evaluated against both mock communities and](#) previously  
64 published datasets and achieved comparable quality results.

65 **Conclusions:** An HPC-based approach was used to develop PEMA, however it can be used in personal  
66 computers as well. Given its time-efficient performance and its quality results, it is suggested that PEMA  
67 can be used for accurate eDNA metabarcoding analysis, thus enhancing the applicability of next-  
68 generation biodiversity assessment studies.

69

## 70 **Keywords:**

71 Pipeline, Container, Docker, Singularity, High Performance Computing, HPC, eDNA, metabarcoding

72

## 73 **Background**

74 Environmental DNA (eDNA) metabarcoding inaugurates a new era in bio- and eco-monitoring [1]. [eDNA](#),  
75 [i.e. genetic material obtained directly from environmental samples \(soil, sediment, water, etc.\) without any](#)  
76 [obvious signs of biological source material \[2\]](#), and metabarcoding, a DNA barcoding method that allows  
77 [the identification of a mixture of organisms, attempt to turn the page into the way biodiversity is perceived](#)  
78 [and monitored \[3\]. Their combination is considered to be a holistic approach that, once standardized,](#)  
79 [allows for higher detection capacity and at a lower cost compared to conventional methods of biodiversity](#)  
80 [assessment. However, from the raw reads sequence files to an amplicon study analysis results, the](#)

81 bioinformatics analysis required can be troublesome for many researchers.

82 Well-established pipelines are available to process metabarcoding data for the case of 16S and 18S rRNA  
83 marker genes and bacterial communities (e.g. mothur [4], QIIME 2 [5], LotuS [6]). However, certain  
84 limitations accompany each of those and occasionally they can be far from easy-to-use pieces of software.  
85 Moreover, there is a great need for similarly straightforward and benchmarked approaches for the analysis  
86 of other marker genes. With respect to the COI marker gene, a number of pipelines have been implemented  
87 (e.g. Barque [7], ScreenForBio [8] etc.). However, there is still the need for a fast, easy-to-install and easy-  
88 to-use pipeline for the COI marker gene, as well as for the ITS.

89 The pipelines mentioned above, although entrenched, they still suffer from a series of hurdles: technical  
90 difficulties in installation and usage, strict limitations in setting parameters for the algorithms invoked,  
91 incompetence in partial re-execution of an analysis, are among the most prominent.

92 Moreover, given the computational demands of such analyses, access to High Performance Computing  
93 (HPC) systems might be mandatory, for example, to process studies with large number of samples. This  
94 is rather timely given the ongoing investment of national and international efforts (for example [9]) to  
95 serve the broad biological community via commonly accessible infrastructures.

96 PEMA is an open-source pipeline that bundles state-of-the-art bioinformatic tools for all necessary steps  
97 of amplicon analysis and aims to address the issues mentioned above. It is designed for paired-end  
98 sequencing studies and is implemented in the BigDataScript (BDS) [10] programming language. BDS's  
99 *ad hoc* task parallelism and task synchronization, supports heavyweight computation which PEMA  
100 inherits. In addition, BDS supports *checkpoint* files that can be used for partial re-execution and crash  
101 recovery of the pipeline. PEMA builds on this feature to serve tool and parameter exploratory  
102 customization for optimal metabarcoding analysis fine tuning. Switching effortlessly between (Molecular)  
103 Operational Taxonomic Units ((M)OTUs) clustering and Amplicon Sequence Variants (ASVs) inference  
104 algorithms is a pertinent example. Finally, via software containerization technologies such as Docker [11]  
105 and Singularity [12], with the latter being HPC-centered, PEMA is distributed in an easy to download and  
106 install fashion on a range of systems from regular computers, to cloud or HPC environments.

107 From the biology perspective, monitoring the whole biodiversity in general, in all its different levels, is of

108 great importance. As there is not a single marker gene to detect all taxa, researchers need to use different  
109 genes targeting each great taxonomy group separately [13]. To that end, PEMA supports the  
110 metabarcoding analysis of both prokaryotic communities, based on the 16S rRNA marker gene, and  
111 eukaryotic ones, based on the ITS (for Fungi), and COI and 18S rRNA (for Metazoa) marker genes [13].  
112 As High Throughput Sequencing (HTS) data become more and more accurate, ASVs, i.e. marker gene  
113 amplified sequence reads that differ in at least one nucleotide to each other, become easier to resolve [14].  
114 The use of ASVs instead of OTUs has been suggested [14], however the choice for which approach to use  
115 should rely on each study's objective(s) [15].  
116 PEMA supports both OTU clustering and ASV inference for all marker genes (see "OTU clustering vs  
117 ASV inference" in the "Results and discussion" section). Two clustering algorithms, VSEARCH [16] and  
118 CROP [17], are employed for the clustering of reads in (M)OTUs; the former for the case of the 16S/18S  
119 rRNA marker genes, the latter for the case of COI and ITS. Swarm v2 [18] allows ASV inference in all  
120 cases.  
121 Taxonomic assignment is performed in an alignment-based approach, making use of the CREST  
122 LCAClassifier [19] and the Silva database [20] for the case of 16S and 18S rRNA marker genes; the Unite  
123 database [21] is used for the ITS gene. In the 16S marker gene case, phylogeny-based assignment is also  
124 supported, based on RAxML-ng [22], EPA-ng [23] and Silva [20]. For the COI marker gene, the  
125 RDPCClassifier [24] and the MIDORI database [25] are used for the taxonomic assignment. In addition,  
126 ecological and phylogenetic analysis are facilitated via the "phyloseq" R package [26].  
127 All the pipeline- and third-party-module-controlling parameters are defined in a plain *parameter-value*  
128 *pair* text file. Its straightforward format eases the analysis fine tuning, complementary to the  
129 aforementioned *checkpoint* mechanism. A tutorial about PEMA and installation guidance can be found on  
130 PEMA's GitHub repository (<https://github.com/hariszaf/pema>).

131

## 132 **Implementation**

133 PEMA's architecture comprises four main parts taking place in tandem (Figure 1). Detailed description of  
134 the tools invoked by PEMA and their licences is included in Additional file 1: Supplementary Methods.



135

## 136 **Part 1: Quality control and pre-processing of raw data**

137 Before all else, FastQC [27] is used to obtain an overall read-quality summary; [the visual inspection of](#)  
138 [each sample's quality may recommend to remove those with utterly poor quality and run again the analysis.](#)

139 [To correct the errors produced by the sequencer, PEMA incorporates a number of tools. Trimmomatic \[28\]](#)  
140 [implements a series of trimming steps, namely: either to remove parts of the sequences corresponding to](#)  
141 [the adapters or the primers, or to trim and crop parts of the reads, or even remove a read completely, when](#)  
142 [it fails to reach the quality filtering standards set by the user. Cutadapt \[29\] is used additionally for the](#)  
143 [case of ITS to address the variability in length of this marker gene \(see Additional file 1: Supplementary](#)  
144 [Methods\). BayesHammer \[30\], an algorithm of the SPAdes assembly toolkit \[31\], revises incorrectly](#)  
145 [called bases. PANDAseq \[32\] assembles the overlapping paired-end reads and then the 'obiuniq' program](#)  
146 [of OBITools \[33\] groups all the identical sequences in every sample, keeping a track of their abundances.](#)  
147 [The VSEARCH package \[16\] is invoked for the chimera removal.](#)

148

## 149 **Part 2: (M)OTUs clustering and ASV inference**

150 Quality controlled and processed sequences are subsequently clustered into (M)OTUs [or treated as input](#)  
151 [for inferring ASVs.](#) For the case of 16S and 18S rRNA marker genes, VSEARCH [16] is used [for the case](#)  
152 [of OTU clustering, while ASVs can be identified by the Swarm v2 algorithm \[18\]. VSEARCH is an](#)  
153 [accurate and fast tool that can handle large datasets; at the same time it is a great alternative of USEARCH](#)  
154 [\[34\] as it is distributed under an open source license.](#)

155 For the ITS and COI marker genes, CROP [17], an unsupervised probabilistic Bayesian clustering  
156 algorithm that models the clustering process using Birth-death Markov chain Monte Carlo (MCMC). The  
157 CROP clustering algorithm is adjusted by a series of parameters need to be tuned by the user (namely  $b$ ,  $e$   
158 and  $z$ ). These parameters depend on specific dataset properties like the length and the number of reads.  
159 PEMA, automatically adjusts  $b$ ,  $e$  and  $z$  by collecting such information and applying the CROP  
160 recommended parameter-setting rules [17]. [ASV inference is conducted by Swarm v2 \[18\] in this case](#)  
161 [too.](#)

162 As the Swarm v2 algorithm is not affected by chimeras (F. Mahé, personal communication), when Swarm  
163 v2 is selected, chimera removal occurs after the clustering (see Additional file 1: [Supplementary Methods:  
164 Swarm v2](#)). This leads to a computational time gain as chimeras are sought among ASVs, instead of  
165 ungrouped reads.

166 Last, any singletons, *i.e.* [sequences with only one read](#), occurring after the (M)OTU clustering or the ASV  
167 inference, [may be removed according to the user's parameter settings](#).

168

### 169 **Part 3: Taxonomy assignment**

170 Alignment-based taxonomy assignment is supported for [all](#) marker gene analyses. In the [case of the  
171 16S/18S rRNA and ITS](#) marker genes, the LCAClassifier algorithm of the CREST set of resources and  
172 tools [19], is used together with the Silva [20] [and the Unite \[21\]](#) database, [respectively](#), to assign  
173 taxonomy to the OTUs. Two versions of Silva are included in PEMA: 128 (Sept 29, 2016) and 132 (Dec  
174 13, 2017). [As classifiers need first to be trained for each database they use, for future Silva \[20\] versions  
175 new PEMA versions will be available.](#)

176 For the COI marker gene, PEMA uses the RDPClassifier [24] and the MIDORI reference [database \[25\]](#) to  
177 assign taxonomy of the MOTUs. The MIDORI database contains quality controlled metazoan  
178 mitochondrial gene sequences from GenBank [35].

179 Intended primarily for studies from less explored environments, phylogeny-based assignment is available  
180 for 16S rRNA marker gene data. PEMA maps OTUs to a custom reference tree of 1000 Silva-derived  
181 consensus sequences (created using RAxML-ng [22] and gappa (phat algorithm) [36], Figure 2A). PaPaRa  
182 [37] and EPA-ng [23] combine the OTU clustering output and the reference tree to produce a phylogeny-  
183 aware alignment and map the 16S rRNA OTUs to the custom reference tree. Beyond the context of PEMA,  
184 users may visualize the output with tree viewers like iTOL [38] (Figure 2B).

185

### 186 **Part 4: Ecological downstream analysis of the taxonomy assigned (M)OTU/ASV tables**

187 [PEMA's major output is either an \(M\)OTU or an ASV table with the assigned taxonomies and the  
188 abundances of each taxon in every sample.](#) For each sample of the analysis, a subfolder containing statistics

189 about the quality of its reads, as well as the taxonomies and their abundances, is also returned.  
190 Via the “phyloseq” R package [26], downstream ecological analysis of the taxonomically assigned OTUs  
191 or ASVs is supported. This includes alpha- and beta-diversity analysis, taxonomic composition, statistical  
192 comparisons and calculation of correlations between samples.  
193 When selected, in addition to the phyloseq’s [26] output, a Multiple Sequence Alignment (MSA) and a  
194 phylogenetic tree of the OTU/ASVs retrieved can be returned; for the MSA, the MAFFT [39] aligner is  
195 invoked while the latter is being built by RAxML-ng [22].

196

### 197 **PEMA container-based installation**

198 An easy way of installing PEMA is via its containers. A dockerized PEMA version is available at  
199 <https://hub.docker.com/r/hariszaf/pema>. Singularity users can *pull* the PEMA image from  
200 <https://singularity-hub.org/collections/2295>. Between the two containers, the Singularity-based one is  
201 recommended for HPC environments due to Singularity’s improved security and file accessing properties  
202 [40]. For detailed documentation, visit <https://github.com/hariszaf/pema>.

203

### 204 **PEMA output**

205 All PEMA-related files (i.e. intermediate files, final output, *checkpoint* files and per-analysis-parameters)  
206 are grouped in distinct (self-explanatory) subfolders per major PEMA pipeline step. In the last subfolder,  
207 i.e. subfolder 8, the results are further split in folders per sample. This eases further analysis both within  
208 the PEMA framework (like partial re-execution for parameter exploration) or beyond. An extra subfolder  
209 is created when an ecological analysis via the “phyloseq” package has been selected.

210

## 211 **Results and discussion**

### 212 **Evaluation**

213 To evaluate PEMA, two approaches were followed. First, PEMA was benchmarked against mock  
214 community datasets. Second, PEMA was used to analyse previously published datasets. PEMA’s output  
215 was then compared with the original study outcome as well as with the output of QIIME2, Lotus, Mothur

216 and Barque (where applicable).  
217 Four mock communities, one for each marker gene were used. With respect to the 16S rRNA marker gene,  
218 a mock community of *Gohl* et al. [41] with 20 different bacterial species was studied. Correspondingly, in  
219 the case of 18S rRNA marker gene, a mock community of *Bradley* et al. [42] with 12 algal species was  
220 used; for the ITS, one of *Bakker* [43] including 19 different fungal taxa and for the case of the COI marker  
221 gene, a mock community of *Bista* et al. [44] containing 14 metazoan species. More information on the  
222 mock communities, their original studies and the results of PEMA for various combinations of parameters  
223 can be found in Additional File 2: Mock Communities.

224 Complementary to the mock community evaluation, two publicly available datasets from published studies  
225 were investigated through PEMA. For the 16S rRNA marker gene, the dataset reported by *Pavloudi* et al.  
226 [45] was used; the original study aimed at investigating the sediment prokaryotic diversity along a transect  
227 river-lagoon-open sea. For the COI case, the one of *Bista* et al. [46] was used; in this study it was  
228 investigated whether eDNA can be used for the accurate detection of chironomids (a taxonomic group of  
229 macroinvertebrates) in a freshwater habitat.

230 In both approaches, the respective .fastq files were downloaded from the European Nucleotide Archive  
231 (ENA) of the European Bioinformatics Institute ENA-(EBI) using ‘ENA File Downloader version 1.2’  
232 [47] and PEMA was run on the in-house HPC cluster.

233 All analyses were conducted on identical Dell M630 nodes (128GB RAM, 20 physical Intel Xeon 2.60GHz  
234 cores).

235

### 236 **Mock community evaluation**

237 PEMA was tested against mock communities and 3 statistical metrics were calculated to estimate the  
238 accuracy of its output. Thus, the precision, i.e the ratio of true positives (TP) over the total number of true  
239 (TP) and false positives (FP) predicted by a model (precision =  $TP / (TP + FP)$ ), the recall, i.e the ratio of  
240 TP over the total number of TP and false negatives (FN) (recall =  $TP / (TP + FN)$ ) and the F1-score, i.e  
241 the harmonic mean of precision and recall indices were estimated [48] to that end.

242 **Table 1: Summary benchmark of PEMA marker-gene specific mock community recovery**

243 (precision)

| marker gene | precision | recall | F1   |
|-------------|-----------|--------|------|
| 16S rRNA    | 0.81      | 0.85   | 0.83 |
| 18S rRNA    | 0.75      | 0.90   | 0.82 |
| ITS         | 0.79      | 0.94   | 0.86 |
| COI         | 0.62      | 0.93   | 0.74 |

244

245 Adequate accuracy was achieved when PEMA was used to recover the marker gene specific mock  
246 communities at the genus level. Precision and recall scores of ~80% or more are observed with two  
247 exceptions in precision but also three very high scores in recall. Overall the precision and recall harmonic  
248 mean (F1) scores range from 74% to 86%. A detailed description of the benchmark methodology and  
249 statistics analysis is given in the Additional file 2: Mock Communities.

250 Detailed presentation of per-marker-gene-specific mock community recovery via PEMA is provided in  
251 the following sections. A number of different sets of parameters was chosen for each marker gene. Each  
252 marker gene has special features (length variability, sequence variability etc.) and each Illumina run has  
253 its own intrinsic biases (primers used, PCR protocol etc.); thus, parameters' tuning plays a crucial part in  
254 metabarcoding analyses. In an attempt to analyze thoroughly the sequence data from the mock  
255 communities, various sets of parameters were tested based on the experimental details of the published  
256 studies but also in an exploratory way.

257

### 258 *16S rRNA*

259 When PEMA was performed with the Swarm v2 algorithm ( $d = 3$ , strictness = 0.6) and the singletons were  
260 not removed, 18 out of the 20 taxa were identified to the genus level; 3 of them even to the species level.  
261 There were 2 species, *Deinococcus radiodurans* and *Propionibacterium acnes*, that were not found in any  
262 of the PEMA runs. According to Gohl et al. [41], there was a discrepancy in the identification of those two  
263 species which was dependent on the amplification protocol used, i.e. EMP (Taq) or DI (KAPA) protocol.  
264 It is worth mentioning that as  $d$  increases, taxa cannot be identified to species level at all; however, there  
265 is a great shrinkage of the false positive assignments. Thus, when  $d = 30$  and strictness = 0.6 for the KAPA

266 samples, *Enterococcus* is not identified at all, however PEMA gets its greatest F1 value (at the genus level,  
267 see Table 1), as the false positive assignments returned are minimized. When PEMA was run using the  
268 VSEARCH clustering algorithm, high precision values were returned in all cases (>0.79). However, the  
269 recall values were decreased when using Swarm v2 (0.65 - 0.68).

270 A great number of different parameter settings were tested, especially for the steps of quality trimming of  
271 the reads and the OTU clustering / ASV inference. The differences of their output indicate how sensitive  
272 this method is, as well as the great need of a mock community in every metabarcoding study; both as a  
273 control but also as a “tuning system” for the parameter setting of the pipeline used.

274

### 275 ***18S rRNA***

276 When PEMA was performed using Swarm v2 algorithm ( $d = 1$ , strictness = 0.5), 3 out of 12 community  
277 members were identified to species level (*Isochrysis galbana*, *Nannochloropsis oculata* and *Thalassiosira*  
278 *pseudonana*), 6 to genus and the rest 3 to class; the latter were all the green algae species (Chlorophyta)  
279 of the mock community. However, a better F1 score (0.82) was achieved when the class of Chlorophyceae  
280 was not found at all ( $d = 1$ , strictness = 0.3) as the false positives were decreased to only 1. When the  
281 VSEARCH algorithm was used, *Isochrysis galbana* was identified only to the genus level, the  
282 *Nannochloropsis* to the order level (Eustigmatales) and the *Poterioochromonas* genus to its class  
283 (Chrysophyceae). Furthermore, as Bradley et al. [42] support, the 2 marine haptophytes of the mock  
284 community (*Prymnesium* and *Isochrysis*) are significantly underrepresented in the samples of the V4  
285 region.

286

### 287 ***ITS***

288 Running PEMA by making use of the Swarm v2 algorithm ( $d = 20$ ) and targeting the ITS2 region, ASVs  
289 from 5 of the 19 species of the mock community were assigned to species level, 10 to genus, 2 to family  
290 and 2 to class level. Contrary to Bakker’s study [43], PEMA identified the genus *Chytriomycetes* in all three  
291 samples, as well as the Ustilaginaceae family. Only one false positive assignment was recorded. When the  
292 CROP algorithm was used, PEMA’s output was less accurate; the *Fusarium* species contained in the mock

293 community were not identified further than their family (Nectriaceae). As mentioned in Bakker's study  
294 [43], many reads deriving from the *Fusarium* spp. were not assigned to species level because of the quality  
295 trimming step. In addition, a manually assemble reference database for the taxonomy assignment was used  
296 in the initial study, containing only sequences of the mock community species, which biased this step and  
297 cannot be directly comparable to our case.

298

### 299 *COI*

300 Running PEMA on *Bista* et al. dataset [44] and using Swarm v2 ( $d = 10$ ) identified 12 out of the 14 species  
301 included in the mock community. The sole non-identified species were *Bithynia leachii* and *Anisus vortex*.  
302 For *B. leachii* no entry exists in the MIDORI database, version MIDORI\_LONGEST\_1.1. However, the  
303 existence of another species of the genus *Bithynia* was recorded. With respect to *A. vortex*, PEMA returned  
304 a high abundance ASV assigned to the *Anisus* genus but with a low confidence level. PEMA managed to  
305 identify all the members of the mock community. This includes *Physa fontinalis*, originally not designed  
306 to be a member of the mock community but as *Bista* et al. [44] explain, was recorded due to cross-  
307 contamination. In the case of COI marker gene, unique sequences with low abundances (singletons or  
308 doubletons) often lead to spurious MOTUs/ASVs. Thus, as shown in the Additional file 2: Mock  
309 Communities, the false positives assignments are decreased when these low abundant sequences are  
310 removed.

311 In addition, as shown in Additional file 2: Mock Communities, the abundance of the assignments retrieved  
312 can indicate false positive assignments. Thus, true positive assignments occur with abundances of  
313 hundreds or even thousands of reads. Contrary to most of the false positives whose abundance is less than  
314 10. That is mostly for the case of the COI marker gene, as Eukaryotes are under study; Eukaryotes have a  
315 great number of copies of this marker gene - different number of copies among the different species - and  
316 not just a single one as it is almost always the case in Bacteria. Therefore, assignments with such low  
317 abundances should be doubted as true positives in analyses on real datasets.

318

### 319 **Comparison to existing software**

320 By the means of evaluation, PEMA's features were compared with those of [mothur](#) [4], [QIIME 2](#) [5],  
321 [LotuS](#) [6] and [Barque](#) [7]. Table 2 presents a detailed comparison among the four tool features in terms of  
322 marker gene support, diversity and phylogeny analysis capability, parameter setting and mode of  
323 execution, operation system availability and HPC suitability. As shown, PEMA is equally feature-rich, if  
324 not richer in certain feature categories, to the other software packages. In particular, PEMA's support for  
325 COI marker gene studies is distinctive; two methods for the taxonomy assignment are supported and  
326 PEMA's easy-parameter setting, step-by-step execution and container distribution render it user and  
327 analysis friendly.

328

329

330

331 **Table 2: Pipeline comparison.**

| <u>Feature</u>                                              | <u>LotuS</u>                        | <u>QIIME 2</u>                      | <u>mothur</u>                       | <u>Barque</u>                       | <u>PEMA</u>                         |
|-------------------------------------------------------------|-------------------------------------|-------------------------------------|-------------------------------------|-------------------------------------|-------------------------------------|
| 16S rRNA                                                    | <input checked="" type="checkbox"/> | <input checked="" type="checkbox"/> | <input checked="" type="checkbox"/> | <input type="checkbox"/>            | <input checked="" type="checkbox"/> |
| 18S rRNA                                                    | <input checked="" type="checkbox"/> | <input checked="" type="checkbox"/> | <input checked="" type="checkbox"/> | <input type="checkbox"/>            | <input checked="" type="checkbox"/> |
| ITS                                                         | <input checked="" type="checkbox"/> | <input checked="" type="checkbox"/> | <input type="checkbox"/>            | <input type="checkbox"/>            | <input checked="" type="checkbox"/> |
| COI                                                         | <input type="checkbox"/>            | <input type="checkbox"/>            | <input type="checkbox"/>            | <input checked="" type="checkbox"/> | <input checked="" type="checkbox"/> |
| diversity indices                                           | <input type="checkbox"/>            | <input checked="" type="checkbox"/> | <input checked="" type="checkbox"/> | <input type="checkbox"/>            | <input checked="" type="checkbox"/> |
| alignment-based taxonomy assignment                         | <input checked="" type="checkbox"/> | <input checked="" type="checkbox"/> | <input checked="" type="checkbox"/> | <input checked="" type="checkbox"/> | <input checked="" type="checkbox"/> |
| phylogenetic-based taxonomy assignment                      | <input checked="" type="checkbox"/> | <input checked="" type="checkbox"/> | <input type="checkbox"/>            | <input type="checkbox"/>            | <input checked="" type="checkbox"/> |
| parameters assigned in the command line                     | <input checked="" type="checkbox"/> | <input checked="" type="checkbox"/> | <input checked="" type="checkbox"/> | <input type="checkbox"/>            | <input type="checkbox"/>            |
| parameters assigned through a text file                     | <input checked="" type="checkbox"/> | <input type="checkbox"/>            | <input type="checkbox"/>            | <input checked="" type="checkbox"/> | <input checked="" type="checkbox"/> |
| step-by-step execution                                      | <input checked="" type="checkbox"/> | <input checked="" type="checkbox"/> | <input checked="" type="checkbox"/> | <input type="checkbox"/>            | <input checked="" type="checkbox"/> |
| all steps in one go possible                                | <input checked="" type="checkbox"/> | <input type="checkbox"/>            | <input type="checkbox"/>            | <input checked="" type="checkbox"/> | <input checked="" type="checkbox"/> |
| available for any Operating System<br>(Linux, OSX, Windows) | <input type="checkbox"/>            | <input checked="" type="checkbox"/> | <input checked="" type="checkbox"/> | <input type="checkbox"/>            | <input checked="" type="checkbox"/> |



|                                                             |                                     |                                     |                                     |                                     |                                     |
|-------------------------------------------------------------|-------------------------------------|-------------------------------------|-------------------------------------|-------------------------------------|-------------------------------------|
| traditional application installation                        | <input checked="" type="checkbox"/> | <input checked="" type="checkbox"/> | <input checked="" type="checkbox"/> | <input checked="" type="checkbox"/> | <input checked="" type="checkbox"/> |
| available as a virtual machine                              | <input type="checkbox"/>            | <input checked="" type="checkbox"/> | <input type="checkbox"/>            | <input type="checkbox"/>            | <input type="checkbox"/>            |
| available as a container                                    | <input type="checkbox"/>            | <input checked="" type="checkbox"/> | <input type="checkbox"/>            | <input type="checkbox"/>            | <input checked="" type="checkbox"/> |
| available for HPC as a container<br>(Singularity container) | <input type="checkbox"/>            | <input type="checkbox"/>            | <input type="checkbox"/>            | <input type="checkbox"/>            | <input checked="" type="checkbox"/> |

332 Comparison of the basic features of the different pipelines.

333

### 334 **Evaluation on real datasets and against other tools**

#### 335 **16S rRNA marker gene analysis evaluation**

336 To evaluate PEMA's performance, a comparative analysis of the *Pavloudi et al.* [45] dataset with mothur  
337 [4], QIIME 2 [5], LotuS [6] and PEMA was conducted.

338 It is known that the choice of parameters affects the output of each analysis; therefore, it is expected that  
339 different user choices might distort the derived outputs. For this reason and for a direct comparison of the  
340 pipelines, we have included all the commands and parameters chosen in the framework of this study in the  
341 Additional file 1: Supplementary Methods. The results of the processing of the sequences by PEMA are  
342 shown in Additional file 3: Table S1. All analyses were conducted on identical Dell M630 nodes (128GB  
343 RAM, 20 physical Intel Xeon 2.60GHz cores). LotuS, mothur and QIIME 2 operated in a single thread  
344 (core) fashion. PEMA, given the BDS intrinsic parallelization [10], operated with up to the maximum  
345 number of node cores (in this case 20).

346 The execution time and the reported OTU number of each tool are presented in Table 3. LotuS and PEMA  
347 resulted in a final number of OTUs comparable to that of *Pavloudi et. al* [45]. Clearly, due to PEMA's  
348 parallel-execution support, the analysis time can be significantly reduced (~1.5 hours in this case). The  
349 executional time is depending on the parameters chosen for each software (see Additional file 1:  
350 Supplementary Methods).

351

352 **Table 3: OTU predictions and executional time for the different pipelines.**

| LotuS | mothur | QIIME 2 | PEMA | <i>Pavloudi et al.</i> [45] |
|-------|--------|---------|------|-----------------------------|
|-------|--------|---------|------|-----------------------------|

|                      |      |                                                         | Deblur | DADA2 |      |      |
|----------------------|------|---------------------------------------------------------|--------|-------|------|------|
| Number of OTUs       | 9849 | 142669                                                  | 517    | 1023  | 6028 | 7050 |
| Executional time (h) | ~9   | ~67<br>(~56 if the reference database is already built) | ~2.5   | ~5    | ~1.5 | ~26  |

353

354 Due to the non-full overlap of the sequence reads, mothur resulted in an inflated number of OTUs; thus,  
355 is was excluded from further analyses. The results of all the pipelines were analyzed with the phyloseq  
356 script that is provided with PEMA. The taxonomic assignment of the PEMA retrieved OTUs is shown in  
357 Figure 5. The phyla that were found in the samples are similar to the ones that were found in [the original  
358 study](#) [45]. Although the lowest number of OTUs was found in the marine station (Kal) ([Additional file 4:  
359 Table S3](#)), which is not in accordance with [Pavloudi et. al](#) [45], the general trend of the decreasing number  
360 of OTUs with the increasing salinity was observed as it was in [the original study](#) (Additional file 5: Figure  
361 S1). Notably, this result was not observed with the other tested pipelines ([Additional file 4: Table S3](#)).  
362 Furthermore, each of the pipelines resulted in a different taxonomic profile (Additional files 6-8: Figure  
363 S2-4) with an extreme case of missing the Order of Betaproteobacteriales (Additional files 9-11: Figure  
364 S5-7).

365 Moreover, when the PERMANOVA analysis was run for the results of PEMA, LotuS and DADA2, it was  
366 clear that the microbial community composition was significantly different in each of the three sampled  
367 habitats (i.e. River, Lagoon, Sea) (PERMANOVA: F.Model = 7.0718,  $p < 0.001$ ; F.Model = 6.5901,  $p <$   
368  $0.001$ , F.Model = 2.2484,  $p < 0.05$ , respectively), which is in accordance with [Pavloudi et. al](#) [45].  
369 However, this was not the case with Deblur (PERMANOVA:  $p > 0.05$ ).

370 Overall, PEMA's output is in accordance with [the original study](#) [45]. [PEMA performed equally well with](#)

371 the other tested pipelines, if not better, in capturing the microbial community diversity and composition of  
372 the samples; simultaneously, it had the shortest executional time.

373

#### 374 **COI marker gene analysis evaluation**

375 *Bista et al.* [46] created two COI libraries of different sizes: COIS (235 bp amplicon size) and COIF  
376 (658 bp amplicon size). The sequencing reads of COIS were selected for PEMA's evaluation; the COIF  
377 sequencing read pairs had no overlap so as to be merged and therefore were not considered appropriate for  
378 the analysis.

379 As previously, PEMA's performance was evaluated through a comparative analysis of the *Bista et al.* [46]  
380 dataset with Barque [7]; the commands and parameters chosen can be found in the Additional file 1:  
381 Supplementary Methods. Regarding the creation of the MOTU table, in the *Bista et al.* [46] study  
382 VSEARCH [16] was used with a clustering at 97% similarity threshold. Afterwards, the BLAST+  
383 (megablast) algorithm [49] was used against a manually created database including all NCBI GenBank  
384 COI sequences of length >100 bp (June 2015) while excluding environmental sequences and higher  
385 taxonomic level information [46]. As discussed in the publication, this approach resulted in 138 unique  
386 MOTUs out of which 73 were assigned to species level. For PEMA's evaluation, the chosen clustering  
387 algorithm was Swarm v2, using different options for the cluster radius ( $d$ ) parameter (Table 4); according  
388 to *Mahé et al.* [18], this is the most important parameter as it affects the number of MOTUs that are being  
389 created. The resulting MOTUs were classified against the MIDORI reference database [25] using  
390 RDPCClassifier [24]. The results of the processing of the sequences are shown in Additional file 12: Table  
391 S3. For the case of Barque, the BOLD Database was used [50].

392 As shown in Table 4, PEMA resulted in 83 species level MOTUs with a cluster radius ( $d$ ) of 2, which is  
393 very similar to that of the published study (i.e. 73 species). Although both the clustering algorithm and the  
394 taxonomy assignment methods were different between the original [46] and the present study, the results  
395 regarding the number of unique species present in the samples are in agreement to a considerable extent.

396 The computational time required by PEMA for the completion of the analysis is also shown in Table 4.

397 Regardless of the value of the  $d$  parameter, all analyses were completed in about 2 hours, ie. adequately

398 fast to allow parameter testing and customization. Regarding Barque, the analysis resulted in the  
 399 identification of 51 species level MOTUs and was concluded in 15 minutes. This difference is due to the  
 400 error correction step of PEMA (BayesHammer algorithm [30]) which plays an important part in the  
 401 enhanced results PEMA returns but it also requires a certain computational time; Barque does not have an  
 402 analogous step, therefore its overall executional time is shorter.

403

404 **Table 4: PEMA's output and executional time.**

|                                             | <i>d</i> = 1 | <i>d</i> = 2 | <i>d</i> = 3 | <i>d</i> = 10 | <i>d</i> = 13 |
|---------------------------------------------|--------------|--------------|--------------|---------------|---------------|
| MOTUs after preprocess and clustering steps | 83791        | 59833        | 33227        | 7384          | 4829          |
| MOTUs after chimera removal                 | 80347        | 57863        | 32539        | 7339          | 4796          |
| Non singletons MOTUs                        | 6381         | 4947         | 2658         | 1914          | 1634          |
| Assigned species                            | 62           | 83           | 86           | 86            | 84            |
| Executional time (h)                        | 02:01:35     | 02:09:49     | 01:51:44     | 02:17:26      | 02:31:15      |

405 PEMA's output and executional time (using a 20 core node) for different values of Swarm's *d* parameter.

406

407 The taxonomic assignment of the retrieved MOTUs is shown in Figures 3-4. Certain .fastq files contained  
 408 very few reads, such as those for sample ERR1308241, and therefore resulted in zero MOTUs upon the  
 409 completion of PEMA; thus, these samples are not included in Figure 3. It is worth mentioning that PEMA  
 410 performed better in identifying taxa that were included in the positive control contents of the published  
 411 study than Barque (Table 5).

412

413 **Table 5: Comparison of the taxonomy of retrieved MOTUs among PEMA, Barque and the positive**  
 414 **controls of Bista et al. [46].**

| Barque                       | PEMA                         | Bista et al. [46]          |
|------------------------------|------------------------------|----------------------------|
| <i>Ablabesmyia monilis</i> * | <i>Ablabesmyia monilis</i> * | <i>Ablabesmyia monilis</i> |

|                                  |                                                                                                                       |                                 |
|----------------------------------|-----------------------------------------------------------------------------------------------------------------------|---------------------------------|
|                                  | <i>Crangonyx pseudogracilis</i> *                                                                                     | <i>Crangonyx pseudogracilis</i> |
|                                  | <i>Radix</i> sp.*                                                                                                     | <i>Radix</i> sp.                |
|                                  | Chironomidae sp.*                                                                                                     | Chironomidae sp.                |
|                                  | <i>Ancylus</i> sp.**                                                                                                  | <i>Ancylus fluviatilis</i>      |
|                                  | <i>Athripsodes aterrimus</i> , <i>Athripsodes cinereus</i> **                                                         | <i>Athripsodes albifrons</i>    |
| <i>Chironomus anthracinus</i> ** | <i>Chironomus</i> sp., <i>Chironomus anthracinus</i> , <i>Chironomus pseudothummi</i> , <i>Chironomus riparius</i> ** | <i>Chironomus tentans</i>       |
|                                  | <i>Polypedilum sordens</i> **                                                                                         | <i>Polypedilum nubeculosum</i>  |
|                                  | <i>Athripsodes aterrimus</i> **                                                                                       | <i>Athripsodes albifrons</i>    |

415 \*: Taxonomies identical to the published study (species level). \*\*: Taxonomies identical to the published  
416 study (genus level).

417

#### 418 OTU clustering vs ASV inference

419 There is an ongoing discussion about whether ASVs exceed OTUs. The strongest argument to this end, is  
420 that ASVs are real biological sequences. Hence, they can be compared between different studies in a  
421 straight-forward way; considered as consistent labels. In comparison, *de novo* OTUs are constructed, or  
422 “clustered”, with respect to the emergent features of each specific dataset. Therefore, OTUs defined in two  
423 different data sets cannot be directly compared.

424 However, the OTU concept is not compulsory related to the clustering approach; it is widely used to  
425 describe results based on its biological meaning but it does not imply clustering. In addition, according to  
426 Callahan et al. [14] “ASV methods infer the biological sequences in the sample prior to the introduction  
427 of amplification and sequencing errors, and distinguish sequence variants differing by as little as one

428 nucleotide”. As a result, ASVs could be considered as OTUs of higher resolution.  
429 It is due to this concept confusion that algorithms whose rationale is considerably closer to the variant-  
430 based approach, are still considered as OTU clustering algorithms. Swarm v2 produces all possible  
431 “microvariants” of an amplicon to implement an exact-string comparison [18]. Furthermore, real  
432 biological sequences, “clouds of microvariants”, are produced as its output, which can be used for  
433 comparisons between different studies. Thus, Swarm v2 can be considered as an ASV inferring algorithm.  
434 Traditional clustering methods have certain limitations such as arbitrary global clustering thresholds,  
435 centroid selection, as it depends on the input order, time-consuming etc, that variant-based approaches  
436 manage to address. However certain algorithms for OTU clustering as VSEARCH have been proven to be  
437 especially reliable and they are widely used by a great number of researchers. Furthermore, ASVs intend  
438 to improve taxonomic resolution; however, too much diversity often leads to a vast number of inferred  
439 ASVs. Thus, the statistical analyses get more complicated and the identification of sets of taxa whom  
440 abundances fluctuate across gradients or sample categories becomes even harder.  
441 ESV or OTU approaches are supported by PEMA, though we support that similar ecological results are  
442 produced by both these methods, as also suggested by *Glassman et al.* [51].

#### 443 444 **Beyond environmental ecology, on-going and future work**

445 PEMA is mainly intended to support eDNA metabarcoding analysis and be directly applicable to next-  
446 generation biodiversity/ecological assessment studies. Given that community composition analysis may  
447 also serve additional research fields, eg. microbial pathology, the potential impact of such pipelines is  
448 expected to be much higher. On-going PEMA work focuses on serving a wide scientific audience and on  
449 making it applicable to more types of studies. The easy set up and execution of PEMA, allows users to  
450 work closely with national and European HPC/e-infrastructures (e.g. ELIXIR Greece [52], LifeWatch  
451 ERIC [53], EMBRC ERIC [54]). To that end and in a mid-term perspective, a Common Workflow  
452 Language (CWL) version of PEMA will be explored. The aim of this effort is to reach out to a wider  
453 scientific audience and address both their ongoing as well as future analysis needs.  
454 By supporting the analysis of the most commonly used marker genes for Bacteria and Archaea (16S

455 rRNA), Fungi (ITS) and Metazoa (COI/18S rRNA), a holistic biodiversity assessment approach is now  
456 possible through PEMA and eDNA metabarcoding; Though, in a mid term perspective, it is our intention  
457 to allow *ad hoc* and in-house databases to be used as reference for the taxonomy assignment.

458

## 459 **Conclusions**

460 PEMA is an accurate, execution friendly and fast pipeline for eDNA metabarcoding analysis. It provides  
461 a per-sample analysis output, different taxonomy assignment methods and graphics-based  
462 biodiversity/ecological analysis. This way, in addition to (M)OTU/ASV calling, it provides users with  
463 both an informative study overview and detailed result snapshots.

464 Thanks to a nominal number of installation and execution commands required for PEMA to be set and  
465 run, it is considered essentially user friendly. In addition, PEMA's strategic choice of a single parameter  
466 file, implementation programming language, and multiple container-type distribution, grant it with speed  
467 (running in parallel), on-demand partial pipeline enactment, and provision for HPC-system-based sharing.

468 All the aforementioned features, render PEMA attractive for biodiversity/ecological assessment analyses.

469 By supporting the analysis of the most commonly used marker genes for Prokaryotes (Bacteria and  
470 Archaea), as well as Eukaryotes (Fungi and Metazoa), PEMA allows assessment of biodiversity in  
471 different levels of biodiversity. Applications may mainly concern environmental ecology with possible  
472 extensions to fields like microbial pathology and gut microbiome, inline with modern research needs, from  
473 low volume to big data.

474

## 475 **Availability of supporting source code and requirements**

476 Project name: PEMA

477 Project home page: <https://github.com/hariszaf/pema>

478 Archived version: see project home page (github repository)

479 Operating system(s): Platform independent

480 Programming language: BigDataScript

481 Other requirements: Singularity (in case of HPC usage)  
482 License: GNU GPLv3 (for 3rd party components separate licenses apply)  
483 Any restrictions to use by non-academics: licence needed

484

## 485 **Availability of supporting data**

486 The sequence data that support the findings of this study, with respect to [the mock-community-based](#)  
487 [evaluation](#), are available in European Nucleotide Archive (ENA) with [the following study accession](#)  
488 [numbers](#) - for the 16S, 18S rRNA, ITS and COI marker genes respectively:

489 [PRJNA305443](https://www.ebi.ac.uk/ena/browser/view/PRJNA305443) (<https://www.ebi.ac.uk/ena/browser/view/PRJNA305443>),

490 [PRJNA314977](https://www.ebi.ac.uk/ena/browser/view/PRJNA314977) (<https://www.ebi.ac.uk/ena/browser/view/PRJNA314977>),

491 [PRJNA377530](https://www.ebi.ac.uk/ena/browser/view/PRJNA377530) (<https://www.ebi.ac.uk/ena/browser/view/PRJNA377530>) and

492 [PRJEB23036](https://www.ebi.ac.uk/ena/browser/view/PRJEB23036) (<https://www.ebi.ac.uk/ena/browser/view/PRJEB23036>)

493 The real datasets used are also available in ENA:

494 [PRJEB20211](http://www.ebi.ac.uk/ena/data/view/PRJEB20211) (<http://www.ebi.ac.uk/ena/data/view/PRJEB20211>) and

495 [PRJEB13009](https://www.ebi.ac.uk/ena/data/view/PRJEB13009) (<https://www.ebi.ac.uk/ena/data/view/PRJEB13009>).

496

## 497 **Declarations**

### 498 **List of abbreviations**

499 BDS: BigDataScript

500 COI: Cytochrome Oxidase Subunit 1

501 eDNA: Environmental DNA

502 MOTU: Molecular Operational Taxonomic Unit ([used](#) for Eukaryotes)

503 HPC: High Performance Computing

504 MCMC: Markov chain Monte Carlo

505 MSA: Multiple Sequence Alignment

506 OTU: Operational Taxonomic Unit ([used](#) for prokaryotes)

507 PEMA: a Pipeline for Environmental DNA Metabarcoding Analysis



508 SSU: Small Subunit

509 [CWL: Common Workflow Language](#)

510

511 **Ethics approval and consent to participate**

512 Not applicable

513

514 **Consent for publication**

515 Not applicable

516

517 **Competing interests**

518 The authors declare that they have no competing interests

519

520 **Funding**

521 This project has received funding from the Hellenic Foundation for Research and Innovation (HFRI) and  
522 the General Secretariat for Research and Technology (GSRT), under grant agreement No 241 (PREGO  
523 project). There was no additional external funding received for this study. The funders had no role in study  
524 design, data collection and analysis, decision to publish, or preparation of the manuscript.

525

526 **Authors' contributions**

527 HZ conceived and designed the pipeline, performed its containerization, analyzed and interpreted the data,  
528 wrote the paper, prepared figures and/or tables, reviewed drafts of the paper. HQV offered support in the  
529 HPC preparation and setup and in 3rd party component usage. KV and CA conceived the idea and  
530 reviewed drafts of the paper. PT conceived the idea, proposed the usage of the programming language and  
531 reviewed drafts of the paper. CP conceived the idea, prepared figures and/or table and reviewed drafts of  
532 the paper. AP offered support in HPC and in 3rd party components. EP conceived the idea, assisted with  
533 programming and setup and reviewed drafts of the paper. All authors read and approved the final  
534 manuscript.

535

## 536 **Acknowledgements**

537 The authors would like to thank: a. the Information technology (IT) group of HCMR and especially Mr  
538 Stelios Ninidakis, Mr Georgios Tsamis and Mr Dimitris Sidirokastritis for their help and support during  
539 cluster maintenance and installation of third party software. b. Dr. Christos A. Christakis (ORCID iD:  
540 0000-0002-7075-0996) for his valuable feedback on ecological analysis usefulness aspects.

541 This research was supported in part through computational resources provided by IMBBC (Institute of  
542 Marine Biology, Biotechnology and Aquaculture) of the HCMR (Hellenic Centre for Marine Research).  
543 Funding for establishing the IMBBC HPC has been received by the MARBIGEN (EU Regpot) project,  
544 LifeWatchGreece RI and the CMBR (Centre for the study and sustainable exploitation of Marine  
545 Biological Resources) RI.

546

## 547 **References**

548 [1] Pavan-Kumar A, Gireesh-Babu P, Lakra WS. DNA metabarcoding: a new approach for rapid  
549 biodiversity assessment. *J Cell Sci Mol Biol.* 2015;2(1):111.

550 [2] Thomsen PF and Willerslev E. Environmental dna—an emerging tool in conservation for monitoring  
551 past and present biodiversity. *Biological Conservation.* 2015; 183:.4–18.

552 [3] Ji Y, Ashton L, Pedley SM, Edwards DP, Tang Y, Nakamura A, Kitching R, Dolman PM, Woodcock  
553 P, Edwards FA, Larsen TH. Reliable, verifiable and efficient monitoring of biodiversity via  
554 metabarcoding. *Ecology letters.* 2013 Oct;16(10):1245-57.

555 [4] Schloss PD, Westcott SL, Ryabin T, Hall JR, Hartmann M, Hollister EB, et al. Introducing mothur:  
556 open-source, platform-independent, community-supported software for describing and comparing  
557 microbial communities. *Appl. Environ. Microbiol.* 2009; 75:7537-41.

558 [5] Bolyen E, Rideout JR, Dillon MR, Bokulich NA, Abnet C, Al-Ghalith GA, et al. QIIME 2:  
559 Reproducible, interactive, scalable, and extensible microbiome data science. *PeerJ Preprints.* 2018;  
560 6:e27295v2.

561 [6] Hildebrand F, Tadeo R, Voigt AY, Bork P, Raes J. LotuS: an efficient and user-friendly OTU

562 processing pipeline. *Microbiome*. 2014; 2:30.

563 [7] Normandeau E. Environmental DNA metabarcoding analysis.  
564 <https://github.com/enormandeau/barque>. Accessed 10 November 2019.

565 [8] Axtner J, Crampton-Platt A, Hoerig LA, Mohamed A, Xu CC, Yu DW, Wilting A. An efficient and  
566 robust laboratory workflow and tetrapod database for larger scale environmental DNA studies.  
567 *GigaScience*. 2019 Apr 13;8(4):giz029.

568 [9] European Strategy Forum on Research Infrastructures Innovation Working Group. Innovation-oriented  
569 cooperation of Research Infrastructures. Vol.3. ESFRI Scripta. 2018.

570 [10] Cingolani P, Sladek R, Blanchette M. BigDataScript: a scripting language for data pipelines.  
571 *Bioinformatics*. 2014; 31:10-16.

572 [11] Rad BB, Bhatti HJ, Ahmadi M. An introduction to docker and analysis of its performance.  
573 *International Journal of Computer Science and Network Security (IJCSNS)*. 2017; 17:228.

574 [12] Kurtzer GM, Sochat V, Bauer MW. Singularity: Scientific containers for mobility of compute. *PloS*  
575 *one*. 2017; 12:e0177459.

576 [13] Coissac E, Riaz T, Puillandre N. Bioinformatic challenges for DNA metabarcoding of plants and  
577 animals. *Molecular ecology*. 2012 Apr;21(8):1834-47.

578 [14] Callahan BJ, McMurdie PJ, Holmes SP. Exact sequence variants should replace operational  
579 taxonomic units in marker-gene data analysis. *The ISME journal*. 2017 Dec;11(12):2639.

580 [15] Pauvert C, Buée M, Laval V, Edel-Hermann V, Fauchery L, Gautier A, Lesur I, Vallance J, Vacher  
581 C. Bioinformatics matters: the accuracy of plant and soil fungal community data is highly dependent on  
582 the metabarcoding pipeline. *Fungal Ecology*. 2019 Oct 1;41:23-33.

583 [16] Rognes T, Flouri T, Nichols B, Quince C, Mahé F. VSEARCH: a versatile open source tool for  
584 metagenomics. *PeerJ*. 2016; 4:e2584.

585 [17] Hao X, Jiang R, Chen T. Clustering 16S rRNA for OTU prediction: a method of unsupervised  
586 Bayesian clustering. *Bioinformatics*. 2011; 27:611-8.

587 [18] Mahé F, Rognes T, Quince C, de Vargas C, Dunthorn M. Swarm v2: highly-scalable and high-  
588 resolution amplicon clustering. *PeerJ*. 2015; 3:e1420.

- 589 [19] Lanzén A, Jørgensen SL, Huson DH, Gorfer M, Grindhaug SH, Jonassen I, et al. CREST–  
590 classification resources for environmental sequence tags. *PloS one*. 2012; 7:e49334.
- 591 [20] Quast C, Pruesse E, Yilmaz P, Gerken J, Schweer T, Yarza P, Peplies J, Glöckner FO. The SILVA  
592 ribosomal RNA gene database project: improved data processing and web-based tools. *Nucl. Acids Res*.  
593 2013; 41:D590-6.
- 594 [21] Nilsson RH, Larsson KH, Taylor AF, Bengtsson-Palme J, Jeppesen TS, Schigel D, Kennedy P, Picard  
595 K, Glöckner FO, Tedersoo L, Saar I. The UNITE database for molecular identification of fungi: handling  
596 dark taxa and parallel taxonomic classifications. *Nucleic acids research*. 2018 Oct 29;47(D1):D259-64.
- 597 [22] Kozlov AM, Darriba D, Flouri T, Morel B, Stamatakis A. RAxML-NG: a fast, scalable and user-  
598 friendly tool for maximum likelihood phylogenetic inference. *Bioinformatics*. 2019; btz305.
- 599 [23] Barbera P, Kozlov AM, Czech L, Morel B, Darriba D, Flouri T, Stamatakis A. EPA-ng: massively  
600 parallel evolutionary placement of genetic sequences. *Systematic biology*. 2018; 68:365-9.
- 601 [24] Wang Q, Garrity GM, Tiedje JM, Cole JR. Naive Bayesian classifier for rapid assignment of rRNA  
602 sequences into the new bacterial taxonomy. *Appl. Environ. Microbiol*. 2007; 73:5261-7.
- 603 [25] Machida RJ, Leray M, Ho SL, Knowlton N. Metazoan mitochondrial gene sequence reference  
604 datasets for taxonomic assignment of environmental samples. *Scientific data*. 2017; 4:170027.
- 605 [26] McMurdie JP, Holmes S. phyloseq: an R package for reproducible interactive analysis and graphics  
606 of microbiome census data. *PloS one*. 2013; 8:e61217.
- 607 [27] Andrews S. FastQC. <http://www.bioinformatics.babraham.ac.uk/projects/fastqc/>. Accessed 08 July  
608 2019.
- 609 [28] Bolger AM, Lohse M, Usadel B. Trimmomatic: a flexible trimmer for illumina sequence data.  
610 *Bioinformatics*. 2014; 30:2114-20.
- 611 [29] Martin M. Cutadapt removes adapter sequences from high-throughput sequencing reads. *EMBnet*.  
612 *journal*. 2011 May 2;17(1):10-2.
- 613 [30] Nikolenko SI, Korobeynikov AI, Alekseyev MA. Bayeshammer: Bayesian clustering for error  
614 correction in single-cell sequencing. *BMC genomics*. 2013; S7.
- 615 [31] Bankevich A, Nurk S, Antipov D, Gurevich AA, Dvorkin M, Kulikov AS, et al. Spades: a new

616 genome assembly algorithm and its applications to single-cell sequencing. *Journal of computational*  
617 *biology*. 2012; 19:455-77.

618 [32] Masella AP, Bartram AK, Truszkowski JM, Brown DG, Neufeld JD. PANDAseq: paired-end  
619 assembler for illumina sequences. *BMC bioinformatics*. 2012; 13:31.

620 [33] Boyer F, Mercier C, Bonin A, Le Bras Y, Taberlet P, Coissac E. OBITools: a unix-inspired software  
621 package for dna metabarcoding. *Molecular ecology resources*. 2016; 16:176-82.

622 [34] Edgar RC. Search and clustering orders of magnitude faster than BLAST. *Bioinformatics*. 2010 Aug  
623 12;26(19):2460-1.

624 [35] Benson DA, Cavanaugh M, Clark K, Karsch-Mizrachi I, Ostell J, Pruitt KD, Sayers EW. GenBank.  
625 *Nucleic acids research* 2018; 46:D41-47.

626 [36] Czech L, Barbera P, Stamatakis A. Methods for automatic reference trees and multilevel phylogenetic  
627 placement. *Bioinformatics*. 2018; 35:1151-8.

628 [37] Berger SA, Stamatakis A. PaPaRa 2.0: a vectorized algorithm for probabilistic phylogeny-aware  
629 alignment extension. Heidelberg Institute for Theoretical Studies. 2012.

630 [38] Letunic I, Bork P. Interactive tree of life (itol): an online tool for phylogenetic tree display and  
631 annotation. *Bioinformatics*. 2006; 23:127-8.

632 [39] Katoh K, Misawa K, Kuma KI, Miyata T. Mafft: a novel method for rapid multiple sequence  
633 alignment based on fast fourier transform. *Nucleic acids research*. 2002; 30:3059-66.

634 [40] Chavez J. Singularity: a "Docker" for HPC environments. [https://dev.to/grokcode/singularity--a-](https://dev.to/grokcode/singularity--a-docker-for-hpc-environments-i6p)  
635 [docker-for-hpc-environments-i6p](https://dev.to/grokcode/singularity--a-docker-for-hpc-environments-i6p). Accessed 08 Jul 2019.

636 [41] Gohl DM, Vangay P, Garbe J, MacLean A, Hauge A, Becker A, Gould TJ, Clayton JB, Johnson TJ,  
637 Hunter R, Knights D. Systematic improvement of amplicon marker gene methods for increased accuracy  
638 in microbiome studies. *Nature biotechnology*. 2016 Sep;34(9):942.

639 [42] Bradley IM, Pinto AJ, Guest JS. Design and evaluation of Illumina MiSeq-compatible, 18S rRNA  
640 gene-specific primers for improved characterization of mixed phototrophic communities. *Appl. Environ.*  
641 *Microbiol.*. 2016 Oct 1;82(19):5878-91.

642 [43] Bakker MG. A fungal mock community control for amplicon sequencing experiments. *Molecular*

643 ecology resources. 2018 May;18(3):541-56.

644 [44] Bista I, Carvalho GR, Tang M, Walsh K, Zhou X, Hajibabaei M, Shokralla S, Seymour M, Bradley  
645 D, Liu S, Christmas M. Performance of amplicon and shotgun sequencing for accurate biomass estimation  
646 in invertebrate community samples. *Molecular ecology resources*. 2018 Sep;18(5):1020-34.

647 [45] Pavlodi C, Kristoffersen JB, Oulas A, De Troch M, Arvanitidis C. Sediment microbial taxonomic  
648 and functional diversity in a natural salinity gradient challenge Remane's "species minimum" concept.  
649 *PeerJ*. 2017; 5:e3687.

650 [46] Bista I, Carvalho GR, Walsh K, Seymour M, Hajibabaei M, Lallias D, et al. Annual time-series  
651 analysis of aqueous edna reveals ecologically relevant dynamics of lake ecosystem biodiversity. *Nature*  
652 *communications*. 2017; 8:14087.

653 [47] Harrison PW, Alako B, Amid C, Cerdeño-Tárraga A, Cleland I, Holt S, et al. The European  
654 Nucleotide Archive in 2018. *Nucleic acids research*. 2018; 47:D84-8.

655 [48] Ting K.M. Precision and Recall. In: Sammut C., Webb G.I. (eds) *Encyclopedia of Machine Learning*.  
656 Springer, Boston, MA. 2011.

657 [49] Camacho C, Coulouris G, Avagyan V, Ma N, Papadopoulos J, Bealer K, Madden TL BLAST+:  
658 architecture and applications. *BMC bioinformatics*. 2009; 10:421.

659 [50] Ratnasingham S, Hebert PD. BOLD: The Barcode of Life Data System ([http://www. barcodinglife.](http://www.barcodinglife.org)  
660 [org](http://www.barcodinglife.org)). *Molecular ecology notes*. 2007 May;7(3):355-64.

661 [51] Glassman SI, Martiny JB. Broadscale ecological patterns are robust to use of exact sequence variants  
662 versus operational taxonomic units. *MSphere*. 2018 Aug 29;3(4):e00148-18.

663 [52] ELIXIR-GR. <https://www.elixir-greece.org/> Accessed 08 July 2019.

664 [53] LifeWatch-ERIC. <https://www.lifewatch.eu/> Accessed 08 July 2019.

665 [54] EMBRC. <http://www.embrc.eu/> Accessed 08 July 2019.

666 **Figure legends**

667 **Figure 1: PEMA comprises four parts.** The first step (top left) is the quality control and pre-processing  
668 of the Illumina sequencing reads. This step is common for both 16S rRNA and COI marker genes. The  
669 second step (top right) is the clustering of reads to (M)OTUs [or their inferring to ASVs](#). The third step  
670 (bottom left) is the taxonomy assignment to the generated (M)OTUs/[ASVs](#). In the fourth step (bottom  
671 right), the results of the metabarcoding analysis are provided to the user and visualized.

672 **Figure 2: Phylogeny-based taxonomy assignment.** A: Building a reference tree for the phylogeny-based  
673 taxonomy assignment to 16S rRNA marker gene OTUs: from the latest edition of Silva SSU, all entries  
674 referring to Bacteria and Archaea were used and using “art” algorithm, 10000 consensus taxa were kept.  
675 B: Using PaPaRa and the OTUs that come up from every analysis, an MSA was made and EPA-ng took  
676 over the phylogeny based taxonomy assignment.

677 **Figure 3: [ASVs](#) bar plot at the lowest possible taxonomic level [for the Bista et al. dataset \[46\]](#).** Bar  
678 plot depicting the taxonomy of the retrieved [ASVs](#) with confidence estimate equal or higher than 0.97 at  
679 the lowest possible taxonomic level.

680 **Figure 4: [ASVs](#) bar plot at the species level [for the Bista et al. dataset \[46\]](#).** Bar plot depicting the  
681 taxonomy of the retrieved [ASVs](#) with confidence estimate equal or higher than 0.97 at the species level.

682 **Figure 5: OTUs bar plot at the Phylum level.** Bar plot depicting the taxonomy of the retrieved OTUs  
683 from PEMA [for Pavlouidi’s et al. \[45\] dataset](#), at the Phylum level [for the case of the 16S marker gene](#).

684

685 **Additional files**

686 Additional file 1: Supplementary Methods: Description of tools invoked by PEMA and their licences.  
687 Description of the commands, along with their parameters, used to run PEMA, mothur, LotuS and QIIME  
688 2.

689 [Additional file 2: Mock Communities: Details about the mock communities chosen and their  
690 corresponding studies as well as the returned output of PEMA for each of those for a number of sets of  
691 parameters.](#)

692 Additional file 3: Table S1: Number of sequences after each pre-processing step for the case of 16S rRNA  
693 gene.

694 [Additional file 4: Table S2: Diversity indices of the samples.](#)

695 [Additional file 5: Figure S1: Linear regression between the number of OTUs \(averaged per sampling  
696 station\) and the salinity of the sampling stations. L: Lagoon. S: Sea. R: River. AR: Arachthos. ARO:  
697 Arachthos Neochori. ARDelta: Arachthos Delta. LOin: Logarou station inside the lagoon. LOout: Logarou  
698 station in the channel connecting the lagoon to the gulf. Kal: Kalamitsi.](#)

699 Additional file 6: Figure S2: Bar plot depicting the taxonomy of the retrieved OTUs from LotuS at the  
700 Phylum level.

701 Additional file 7: Figure S3: Bar plot depicting the taxonomy of the retrieved OTUs from QIIME 2 using  
702 Deblur at the Phylum level.

703 Additional file 8: Figure S4: Bar plot depicting the taxonomy of the retrieved OTUs from QIIME 2 using  
704 DADA2 at the Phylum level.

705 Additional file 9: Figure S5: Bar plot depicting the taxonomy of the retrieved OTUs from LotuS at the  
706 class of Betaproteobacteriales.

707 Additional file 10: Figure S6: Bar plot depicting the taxonomy of the retrieved OTUs from QIIME 2 using  
708 Deblur at the class of Betaproteobacteriales.

709 Additional file 11: Figure S7: Bar plot depicting the taxonomy of the retrieved OTUs from PEMA at the  
710 class of Betaproteobacteriales.

711 Additional file 12: Table S3: Number of sequences after each pre-processing step for the case of COI,



712 dataset from *Bista* et al. [46].

713

714

715

### PEMA in a nutshell

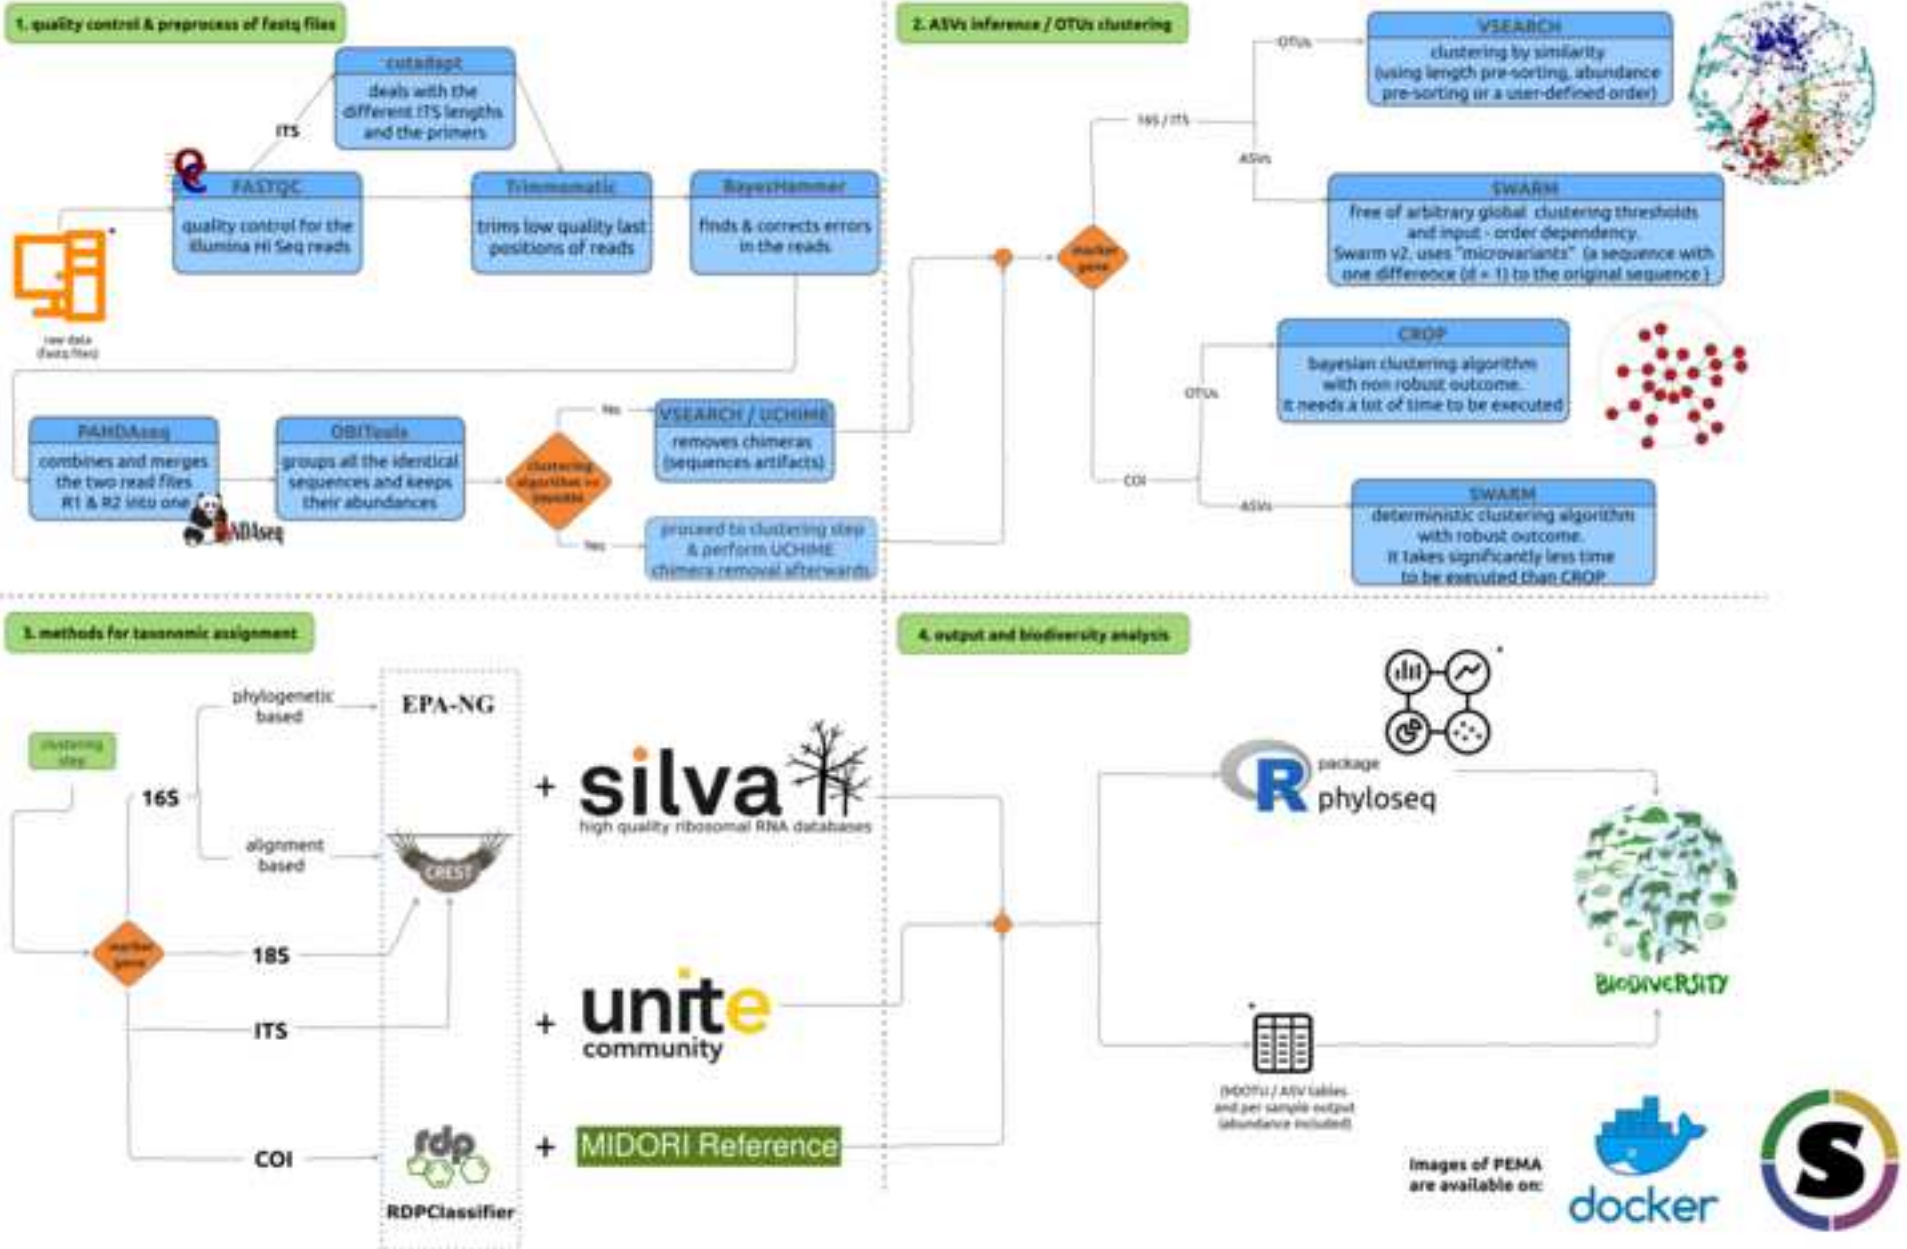

\* Illustrations with copyright are from The Nucleus Project

## A. create reference tree

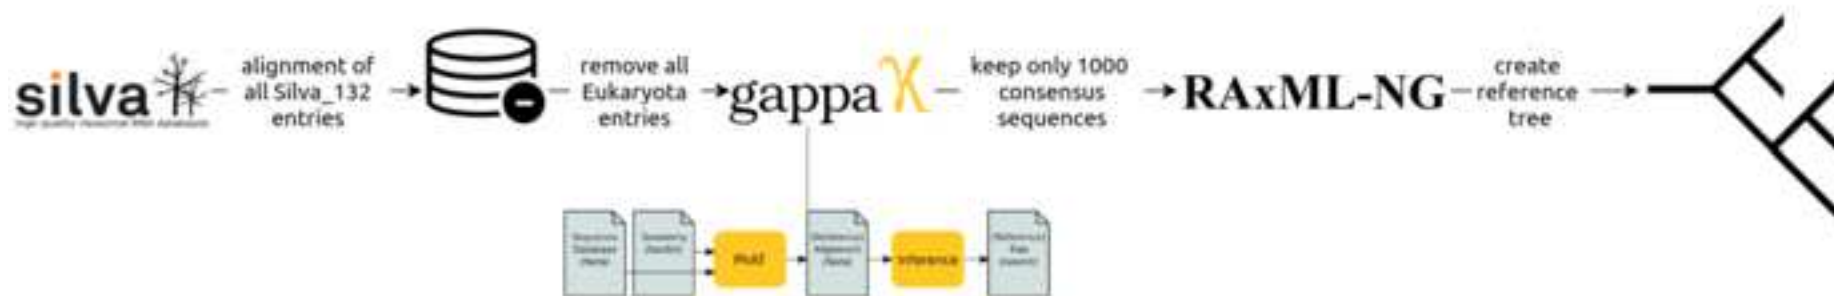

## B. phylogeny-based taxonomy assignment

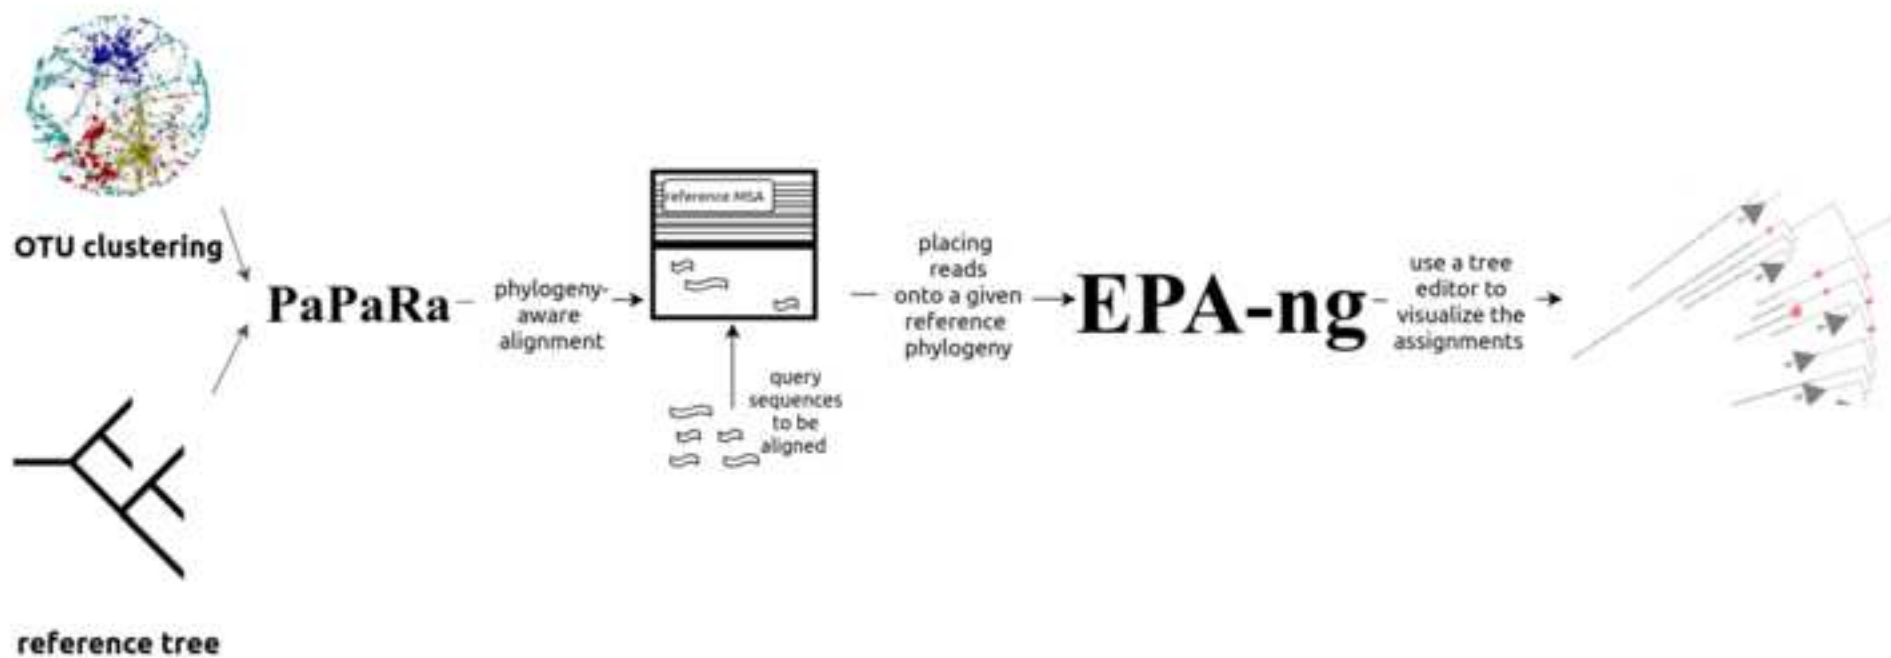





Figure 5

[Click here to download Figure Figure 5.png](#)

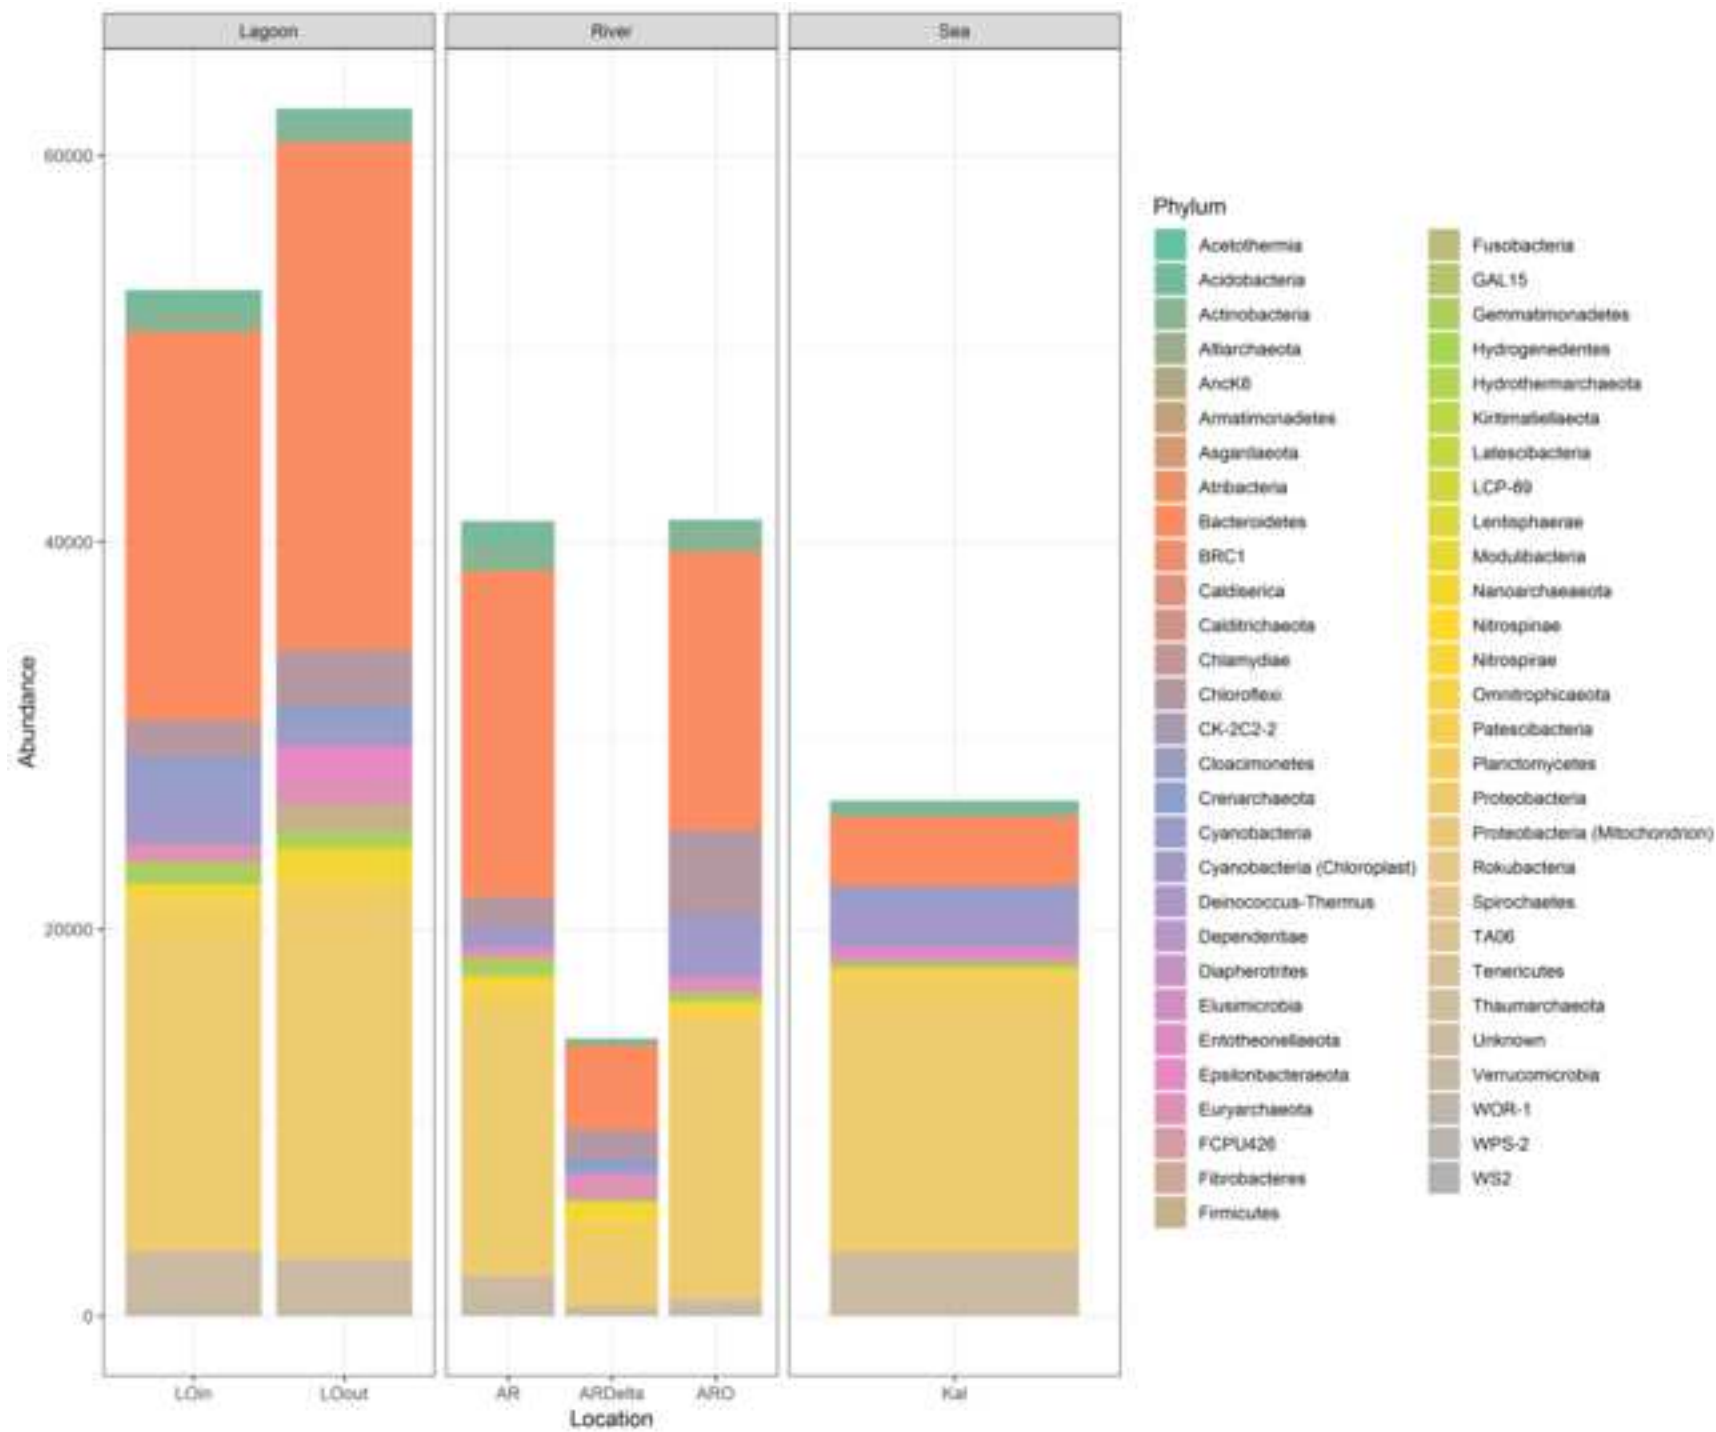

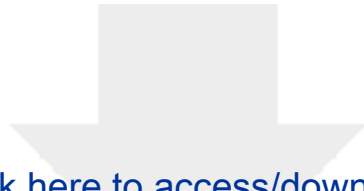

[Click here to access/download](#)

**Supplementary Material**

[Additional file 1\\_ Supplementary Methods.docx](#)

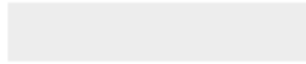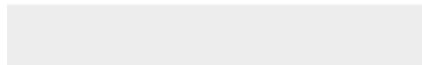

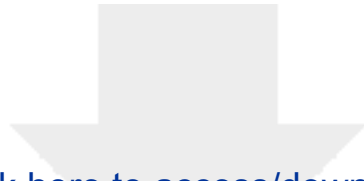

[Click here to access/download](#)

**Supplementary Material**

[Additional file 2\\_ Mock Communities\\_.xlsx](#)

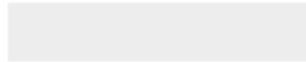



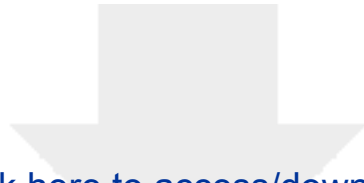

Click here to access/download  
**Supplementary Material**  
Additional file 3 Table S1.docx

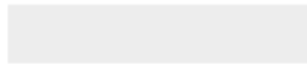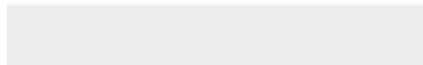



Click here to access/download  
**Supplementary Material**  
Additional file 4 Table S2.docx



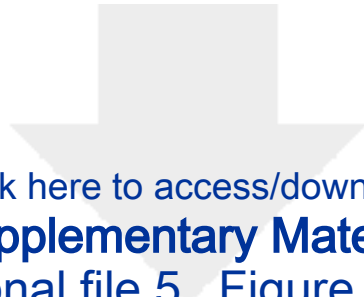

Click here to access/download  
**Supplementary Material**  
Additional file 5\_ Figure S1.png

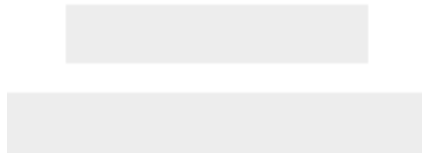



Click here to access/download  
**Supplementary Material**  
Additional file 6 - Figure S2.png

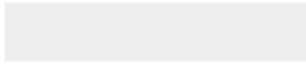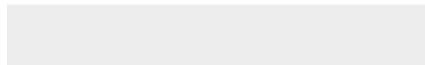



Click here to access/download  
**Supplementary Material**  
Additional file 7 - Figure S3.png

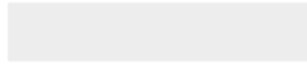



Click here to access/download  
**Supplementary Material**  
Additional file 8 - Figure S4.png





Click here to access/download  
**Supplementary Material**  
Additional file 9 - Figure S5.png





Click here to access/download  
**Supplementary Material**  
Additional file 10 - Figure S6.png







Click here to access/download  
**Supplementary Material**  
Additional file 11 - Figure S7.png





Click here to access/download  
**Supplementary Material**  
Additional file 12\_ Table S3.docx

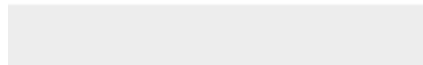

## Response to the editor's and reviewers' comments

We would like to kindly thank the reviewers for the time they spent to thoroughly read our manuscript. We sincerely appreciate all accurate comments made by the reviewers, which helped the improvement of our manuscript. In the revised version, we have addressed all of the reviewers' comments and suggestions and where necessary we have incorporated changes and made amendments and alterations to the manuscript. The changes and the new sections of the manuscript are written in blue. Below we cite our detailed answers (in blue) to the editor and reviewers' comments and suggestions (italic).

---

### Editor's comment #1

*Both reviewers mention flexibility and performance as positive aspects of your tool, and I feel that, with some major extensions and improvements, a revised version may be suitable for publication in GigaScience.*

With respect to Editor's main prompt for major extensions and improvements, we resubmit the PEMA manuscript including two more marker genes (18S rRNA and ITS) and allowing not only OTU clustering, but inferring ASVs as well. In addition, PEMA was evaluated for all the four marker genes not only against results of already published studies, but against mock communities as well. Finally, major improvements in the manuscript have been incorporated.

### Editor's comment #2

*However, both reviewers also mention that there are many available tools that perform similar tasks, and it is not clear at the moment whether the tool really presents a major advance in the field.*

PEMA's novelty is detected on three major features. It supports the analysis of all marker genes used for environmental studies (16S rRNA for Bacteria and Archaea, ITS for Fungi and COI/18S rRNA for Metazoa). It can be used for the case of big datasets; that is because of the BigDataScript programming language in which PEMA has been implemented. In addition, PEMA has been developed in a High Performance Computing (HPC) - based approach to be able to support such analyses. Furthermore, container-based technologies as Docker, for the case of personal computers, and Singularity, for the case of HPC environments, allow PEMA to be rather easy to install. At the same time, the plain *parameter-value* pair text file in which the user sets all the parameters required, makes PEMA user friendly. Finally, the *checkpoints* created allow for further partial re-running of the pipeline, providing the possibility of "investigating" the best tuning for every analysis. It is our belief that the aforementioned features contribute in addressing major issues in the metabarcoding approach.

### Editor's comment #3

*PEMA currently only allows COI marker sequences. Extending the functionality for other markers (and showing respective validation data) could be a major improvement.*

As already mentioned, PEMA has been extended and the 18S rRNA and ITS marker genes are now supported. Further evaluation of PEMA's findings has been performed by running PEMA on mock communities.

### Editor's comment #4

*Both reviewers mention that Amplicon Sequence Variants are increasingly being used instead of OTUs. I feel if your tool could support ASVs, it would be easier to convince us that the tool is an advance for state-of-the-art applications.*

The Swarm v2 algorithm is now an option for all the marker genes supported by PEMA. We support that Swarm v2 produces ASVs as its output meet all ASVs' inferring features; that is also the belief of both Swarm's and DADA2's authors. In addition, with respect to the ongoing discussion about replacing OTU clustering with ASV inferring, an extensive discussion has been added in the manuscript.

### Editor's comment #5

*Both reviewers ask for a more detailed interpretation of the results in comparison with previous metabarcoding pipelines.*

Mock communities were used to address this issue. For all four marker genes comparisons with other pipelines that support each of those was performed. In addition, the comparisons presented in our first submission are now further detailed.

---

### **Reviewer's #1 comment #1**

*I have reviewed the manuscript from Zafeiropoulos et al. "PEMA: from the raw .fastq files of 16S rRNA and COI marker genes to the (M)OTU-table, a thorough metabarcoding analysis". Authors present a flexible pipeline, based on existing bioinformatic tools, to analyse 16S and COI metabarcoding data. This pipeline does not contain any improvement over existing algorithms or analytic tools; but its flexibility and performance time are undoubtedly its major advantages, allowing the user to choose between different tools at each step (and to easily switch from one to another). However, I am not convinced this note meets the novelty and quality standards required for publication in Gigascience.*

*I am not questioning here the potential usefulness of PEMA but similar (and somehow more flexible) friendly-user pipelines have recently been developed (e.g. SLIM, Dufresne et al. 2019 BMC Bioinformatics). One of the motivation of authors seemed originally to be the adaptation of existing pipelines to markers other than bacterial 16S (line 76) but, although this cannot be considered as a critical flaw, PEMA currently allows only COI sequences to be processed. I understand that PEMA could be extended to support other markers by the use of curated reference databases for other taxonomic groups (e.g., SILVA or PR2 for nuclear ribosomal markers, UNITE for fungal ITS etc.). Nevertheless, even if authors claim that ITS and 18S rRNA marker genes will be supported at medium-term, the lack of such capability reduces the interest of this pipeline compared to existing ones (e.g. SLIM).*

With respect to PEMA's novelties and quality standards required for its publication in Gigascience, please see [Response to Editor's comment #2](#). As already mentioned, both 18S rRNA and ITS marker genes are now supported by PEMA.

Regarding the Slim tool, it is our belief that although PEMA and Slim share a number of common features, they should not be directly compared. This is due to their current implementations, that are optimised for different analysis enactment environments. Slim provides an equally good output (from a biological analysis perspective) to non-specialist or command-line reluctant researchers. This is why it has been implemented via a web-based user interface. On the back-end of a Slim installation a local or cloud-based computing server is employed; not however an HPC system. Docker, which is provided as an easy way to run Slim on your own personal computer and is used to ease the back-end (server and sequences analysis tools) components, is also HPC-deficient, e.g. in comparison to Singularity [1]. Contrary, PEMA is an HPC-based tool designed for datasets bigger than what a laptop (personal computer) can address. PEMA draws its simplicity from providing researchers with an easy to set-run (and tweak if needed) environment asking for merely basic command line knowledge. PEMA takes advantage of a series of state-of-the-art HPC-dedicated technologies like the Singularity-based containerisation and BigDataScrip workflow enactment). In order to compare PEMA with other metabarcoding pipelines, LotuS, QIIME2 (includes DADA2 as well) and mothur were performed for the case of the 16S rRNA and Barque for the COI marker gene.

### **Reviewer's #1 comment #2**

*Second, the main text lacks information about the choice of the algorithms and tools introduced in PEMA. For instance, why choosing to include Swarm and CROP for mOTU clustering (or RDPClassifier and LCAClassifier for taxonomic assignment) over other tools? Note that more and more studies now rely on ASV (Amplicon Sequence Variant) rather than OTU clustering. It would have been interesting to discuss the choice of including only OTU clustering programs.*

Advantages and features of each of the tools invoked by PEMA are extensively described in the Supplementary Methods file. That is to avoid adding technical details in the main manuscript. With respect to the OTU clustering - ASV inferring issue, please see [Response to Editor's comment #4](#).

### **Reviewer's #1 comment #3**

*Finally, the abstract claims that "PEMA was evaluated against previously published datasets and achieved*

*comparable quality results". However, I do not really understand the way the comparisons are made (apart from comparing the execution time). The fact that a similar number of OTUs or identified species is retrieved does not provide information about the PEMA performance but about the variability generated when the user decides to use one tool or another. Indeed, alpha-diversity patterns are highly sensitive to the tools used in the data processing and their parameters (beta-diversity patterns are probably more relevant in this regard). Similarly, the fact that authors retrieve alpha-diversity patterns originally published only with PEMA when comparing the outputs of the 16S dataset*

*analysed with different pipelines (lines 247-254) does not mean that PEMA performs better, but rather that the tools used in PEMA were more analogous to the original ones in the way they processed the data. And it is the case: Unlike PEMA and the original pipeline used to process the dataset (Pavloudi et al. 2017), Deblur and DADA2 do not use clustering but rather aim to identify putative true sequences (and are thus much more conservative), which explain the variation in alpha-diversity between pipelines.*

Metabarcoding is a method commonly used for exploratory studies. Thus, it is important to assess the variability that different tools introduce in the produced outputs of each study. The aforementioned variability can distort the results of a study and skew the conclusions that are subsequently formulated. Undoubtedly, the execution time is a crucial issue when choosing tools for analysis of metabarcoding datasets. However, the results produced should be also compared. In our case, this comparison led to the conclusion that certain tools/algorithms, such as DADA2, could not have identified taxonomic groups that were present in the dataset (as mentioned in the original publication) which would have caused a major distortion in the conclusions of the study. We believe that, under this prism, it is important to show that PEMA outperformed the tools that it was compared against.

In addition, please see Response to Editor's comment #5.

#### **Reviewer's #1 comment #4**

*The title could better reflect what PEMA actually does, and particularly its flexibility.*

The title was changed as suggested.

#### **Reviewer's #1 comment #5**

*Line 73: write "e.g. mothur, QIIME, Lotus". There are many other tools (e.g. DADA2).*

Indeed, there are many other tools for the 16S rRNA marker gene analysis. However, we are mentioning these three as we intend to compare PEMA with them. In addition, DADA2 is also mentioned later in the manuscript as one of the QIIME2 features.

#### **Reviewer's #1 comment #6**

*Line 74-76: Please tone-down this sentence. Many tools are usable for usable for the metabarcoding analysis of eukaryotic organisms like obitools. For a friendly-user software, see also the SLIM pipeline for eDNA metabarcoding data (Dufresne et al. 2019 BMC Bioinformatics).*

The sentence was rephrased as suggested.

#### **Reviewer's #1 comment #7**

*Line 96: Does the pipeline offer flexibility in the primers pair used to amplify this region? If so, what primers can be used? Please add references.*

The pipeline is not designed for specific gene regions. The databases used include sequences of the whole marker gene. Thus, metabarcoding data from any region can be analysed through PEMA, as long as the paired end reads can be merged successfully at the relevant step.

#### **Reviewer's #1 comment #8**

*Line 98: Please describe what VSEARCH does exactly in PEMA.*

The sentence was rephrased. Also, since all the tools are described thoroughly in the Supplementary Methods file, more information has been added there.

#### **Reviewer's #1 comment #9**

*Line 99: Write "Taxonomic assignment"*

The sentence was rephrased as suggested.

**Reviewer's #1 comment #10**

*Line 124: Please describe what are the differences between these options.*

The sentence has been removed.

**Reviewer's #1 comment #11**

*Line 125-130: Please precise here that chimeras are expected to form independent OTUs.*

This information has been included in the Supplementary Methods file.

**Reviewer's #1 comment #12**

*Line 133: Remove the ")"*

The sentence was rephrased as suggested.

**Reviewer's #1 comment #13**

*Line 136: What do you mean by "singletons" here: Sequences not assigned to a mOTU or sequence with just one read?*

The term was further explained.

**Reviewer's #1 comment #14**

*Line 141: Are users able to download new releases?*

Not directly. New versions would have to be incorporated by us and the CREST classifier should be trained accordingly, in order to be used for these newer SILVA versions. The two latest Silva versions (v128 and v132) have been included. For future Silva versions (e.g. v138 and onwards), updated Docker and Singularity images of PEMA will be available.

**Reviewer's #1 comment #15**

*Line 216-218: Does Table 3 reflect only assignment of taxa from positive controls? Please precise. What do these positive controls contained originally?*

Table 5 (Table 3 in the previous version of the manuscript) includes taxonomic identifications of the PEMA retrieved MOTUs and makes a comparison between these identifications and taxa that were included in the positive controls of the original publication. We are not fully aware of what these positive controls contained originally as this information is not provided by Bista et al. The only information that they provide is included in the last column of Table 5.

**Reviewer's #1 comment #16**

*Line 268-270: I disagree with this sentence (see comments above).*

Please see Response to Reviewer's #1 comment #3 and Response to Editor's comment #5.

**Reviewer's #1 comment #17**

*Figs. 3 and 4: I am not convinced about the usefulness of these figures as they only present the outputs of PEMA and do not compare the assignments between pipelines.*

The assignments of the different pipelines for the published datasets were included in the original submissions as Additional files 4-8 (Additional files 6-10 in the revised version of the manuscript). So, the reader could compare the results of each pipeline.

**Reviewer's #1 comment #18**

*Table 5: I would suggest converting this table into a graph to improve its readability, and to present it in relation to the salinity to match with its description in the main text. In addition, the legend says that "N=total microbial relative abundance", which does not seem to make sense in this context.*

Additional file 4: Table S2 (Table 5 in the previously submitted version of the manuscript) presents the diversity indices (of the Pavloudi et al dataset) of the samples for each one of the tested pipelines. The columns reflect the

total number of OTUs and the relative abundance of these OTUs. Since we are working with high throughput sequencing data, we cannot use the term “OTU abundance” as high throughput sequencing only provides estimates of the relative abundance of OTUs. Therefore, we do not understand what the reviewer means by his comment that “N [...] does not seem to make sense in this context”.

Please see also Response to Reviewer’s #2 comment #14.

#### **Reviewer’s #1 comment #19**

*In the description of trimmomatic in supplementary methods, what do the authors mean by "technical sequences? Adapter sequences? Please precise. Also, the following sentence is unclear for me, could you please clarify: "Amplicons in particular could cause significant alterations due to their common presence in the end of the reads". The term “technical sequences” was replaced by “sequence artifacts”. The sentence mentioned was also rephrased.*

#### **Reviewer’s #1 comment #20**

*There is no information about the RDPclassifier in the supplementary methods.*

Information with respect to the RDPClassifier and the Midori database was added in the Supplementary Methods file.

#### **Reviewer’s #2 comment #1**

*I really appreciated the opportunity to review your and your co-authors' manuscript. The metabarcoding bioinformatics pipeline you present is potentially a useful new addition to the numerous pre-existing pipelines such as those you have mentioned within the manuscript. In particular, the use of BigDataScript language addresses many common concerns regarding processing speeds of such large datasets and supports checkpoint files that would be useful in rerunning portions of the pipeline with different parameter iterations. In addition, a variety of commonly used programs and databases are implemented such as Swarm, CROP, VSEARCH, LCAClassifier, RDPClassifier, Silva, and MIDORI, which will serve to increase applicability to wide diversity of metabarcoding projects. The inclusion of phylogeny-based assignment through RAxML and EPA should be especially useful for microbial research. Lastly, I appreciate the distribution of PEMA via Docker and Singularity, which should ease installation efforts, as well as the detailed tutorial PDF available on the GitHub repository. I hope you will find my comments useful in improving the paper.*

We thank you for your creative comments.

#### **Reviewer’s #2 comment #2**

*Line 1-2: I would recommend using an alternative title that describes the abbreviated name of the pipeline, PEMA. Although the pipeline does include steps for taxonomic assignment, only (M)OTU-table is currently mentioned. Personally, I do not think the title needs to be so detailed. Something like this would be preferable: "PEMA: Pipeline for Environmental DNA Metabarcoding Analysis of 16S rRNA and COI genes".*

The title has been rephrased. Also, see Response to Reviewer’s #1 comment #4.

#### **Reviewer’s #2 comment #3**

*Lines 74-75: "However, there is none that can be used in a straightforward way for metabarcoding analysis of eukaryotic organisms. For this to be functional, adaptation to other marker genes (e.g COI) is required." There are many metabarcoding pipelines available for processing COI markers for eukaryotes. The following are just some examples.*

- a. [https://github.com/Hajibabaei-Lab/SCVUC\\_COI\\_metabarcoding\\_pipeline](https://github.com/Hajibabaei-Lab/SCVUC_COI_metabarcoding_pipeline)
- b. <https://github.com/alexcrampton-platt/screenforbio-mbc>
- c. <https://journals.plos.org/plosone/article?id=10.1371/journal.pone.0201763>
- d. <https://github.com/cbirdlab/charybdis>
- e. <https://github.com/enormandeaubarque>



f. <https://github.com/limey-bean/Anacapa>

g. <https://chewbacca.readthedocs.io/en/dev/>

The sentence was rephrased. Also, see [Response to Reviewer's #1 comment #5](#) and [Response to Reviewer's #1 comment #6](#).

#### **Reviewer's #2 comment #4**

*Although the manuscript is a technical note, I do think that it would benefit readers to include a brief introduction of what environmental DNA and metabarcoding is and what the advantages are over previous methods of biodiversity assessment.*

[A paragraph was added in the Background to address this.](#)

#### **Reviewer's #2 comment #5**

*The pipeline uses VSEARCH, Swarm, and CROP, which are common methods for clustering individual sequences into operational taxonomic units (OTUs). More recently, amplicon sequence variants (ASVs) have been proposed to supplant OTUs through the DADA2 software (Callahan et al. 2016). ASVs have a variety of advantages over OTUs in terms of resolution, accuracy, and comparability (<https://benjjneb.github.io/dada2/index.html>). One of the major problems with OTU clustering is that de novo clustered OTUs are incomparable across studies. Though not necessary for publication, I think PEMA would benefit greatly from implementation of DADA2 or a discussion of the ability to intake ASV tables for taxonomic assignment within PEMA.*

[We agree with the Reviewer. However, Swarm is also an ASV inferring algorithm, as its authors have mentioned to us in personal communication. The discussion on ASVs and OTUs is ongoing \(an example can be found here: <https://github.com/benjjneb/dada2/issues/62> and here: <https://twitter.com/ambulanzen/status/1187406117942583296>\). We have also added a relevant section in our manuscript entitled "OTU clustering vs ASV inferring".](#)

#### **Reviewer's #2 comment #6**

*Is there a reason why downstream analysis via phyloseq is not implemented for OTU tables generated from COI sequences?*

[Analysis via the phyloseq R package is now available for all the marker genes PEMA supports.](#)

#### **Reviewer's #2 comment #7**

*The writing of the manuscript could be improved. There are a few typos throughout the paper (e.g. "licences" on line 110, extra)" on line 132, etc.) and the following are just a few examples of awkward phrasing or incorrect grammar usage.*

a. Lines 71-72: *"However, from the output of a sequencer to an amplicon study analysis results, it takes a long way."*

b. Lines 112-113: *"Beyond this visual inspection and to correct the errors are produced by a sequencer, PEMA incorporates a number of tools."*

c. Lines 291-292: *"PEMA's user friendliness derives from the easy and with minimal number of installation and execution commands."*

[The sentences mentioned were rephrased.](#)

#### **Reviewer's #2 comment #8**

*All abbreviations should be defined upon first use in the manuscript (e.g. ENA-EBI on line 178).*

[The abbreviation was defined.](#)

#### **Reviewer's #2 comment #9**

*Table 2 shows PEMA's performance using various values of parameter  $d$  in Swarm. There is no discussion of why each value was chosen and why  $d = 2$  was used for comparison.*

[\$d = 2\$  was discussed further because it resulted in a total number of MOTUs similar to the one of the published study. There is no golden standard value of  \$d\$ ; it should be tested and decided for each dataset. Also, values up to 13 have been used in certain cases \[2\]. In addition, a relevant section regarding the values of the parameters and how they can affect the results has been added in the manuscript.](#)



### **Reviewer's #2 comment #10**

*The manuscript notes, "Certain .fastq files contained very few reads, such as those for sample ERR1308241, and therefore resulted in zero MOTUs upon the completion of PEMA; thus, these samples are not included in Figure 3." However, three samples also appear to not contain any assigned OTUs (ERR1308210, ERR1308240, ERR1308243). Multiple samples appear without any assigned OTUs in Figure 4 as well.*

As it can be seen from Additional file 3: Table S1 (Additional file 2 in the previously submitted version of the manuscript), the samples ERR1308210, ERR1308240, ERR1308243 had initial number of reads 711, 1323 and 873 respectively. After the pre-processing, they ended up with 29, 20 and 26 reads. Inevitably, with such low reads, the derived MOTUs were also very low. This is why in figures 3 and 4 it seems as if they have zero MOTUs; in fact, they have 1, 1 and 2 MOTUs (respectively). As mentioned in the originally submitted manuscript, in the case of samples with zero OTUs found, the samples does not appear in the phyloseq figures at all.

### **Reviewer's #2 comment #11**

*Table 3 only shows OTUs that were commonly identified to species and genus level in the original and the current studies. It would be useful to also know which taxa from the positive controls, if any, were only identified in either the original or the current study.*

Please see [Response to Reviewer's #1 comment #15](#).

### **Reviewer's #2 comment #12**

*The discussion about computational times of Table 2 in lines 223-225 should be moved before discussing Table 3. The manuscript has been corrected accordingly.*

### **Reviewer's #2 comment #13**

*It is a known issue that mothur can inflate OTU numbers due to lack of overlap between reads. Have you considered using the phylotype command to assign sequences to OTUs based on taxonomy? <https://www.mothur.org/wiki/Phylotype>*

According to Pat Schloss, when we asked him about the number we got (see: <https://forum.mothur.org/t/number-of-otus-in-shared-file-637/19992>), he replied that "we generally see an inflated number of OTUs when people sequence regions where the two reads do not fully overlap with each other (<http://blog.mothur.org/2014/09/11/Why-such-a-large-distance-matrix/>)".

However, since nothing similar occurred when analyzing the same dataset with the other tools, we believe that there may be some other issue in mothur. Also, regarding the "phylotype" you mention, it is relevant to the taxonomy assignment and not to the creation of OTUs (where we experienced the over-inflation problem).

### **Reviewer's #2 comment #14**

*Table 5 could be included as a supplementary. Such detail is not necessary in the main text.*

The table was moved to the supplementary files as suggested. It is now Additional file 4: Table S2.

### **Reviewer's #2 comment #15**

*Lines 250-251 state "the general trend of the decreasing number of OTUs with the increasing salinity was observed as it was in [30]. Notably, this result was not observed with the other tested pipelines (Table 5)." It is difficult to observe the trend with regards to salinity because salinity values are not provided for any of the samples. These statements should be better demonstrated with a figure showing the trend for only PEMA results and none of the other pipelines.*

The salinity values are provided at the original publication of Pavloundi et al in Table S6. However, in order to facilitate the reader, a graph (Additional file 5: Figure S1) was created showing the linear decrease of the number of OTUs (as derived by PEMA) with salinity.

### **Reviewer's #2 comment #16**

*Lines 252-254 state "Furthermore, each of the pipelines resulted in a different taxonomic profile (Additional files 4-6: Figure S1-3) with an extreme case of missing the Order of Betaproteobacteriales (Additional files 7-9: Figure*

S4-6)." *It is important to explain why this is the case. Can OTUs and taxonomic profiles of complex microbial communities produced via different pipelines really be directly compared in this way? Do the comparisons even make any sense or reveal anything interesting about why they are different? The results from the original study may not represent the "truth" better than these other pipelines. More discussion on these topics is needed for both the 16S and COI comparisons.*

We cannot really know why when we use QIIME with DADA2 we end up missing the order Betaproteobacteriales. Each tool and software developed for metabarcoding analyses produces different results which are not directly comparable to one another, This issue has been discussed extensively in the literature. However, we need to apply a certain degree of comparison when we develop new tools. In this case we chose to use previously published studies in order to see if our tool could produce similar results without distorting the final conclusions of the studies. Furthermore, after your suggestions, we added another level of comparison using mock communities. Also, please see Response to Reviewer's #1 comment #3 and Response to Editor's comment #5.

#### **Reviewer's #2 comment #17**

*In Table 5, please explain what "N: total microbial relative abundance values" is.*

Please see Response to Reviewer's #1 comment #18.

#### **Reviewer's #2 comment #18**

*A general suggestion that there should be at least a brief discussion of the two datasets being used for comparing the various bioinformatics pipelines. What was the goal of the original study, what was the experimental design, why did they sequence those particular samples, etc. This should help readers understand the results of the comparison better.*

Generally, we agree with the reviewer. However, we feel that a discussion on the datasets is not crucial for the reader, since we aim to present our pipeline and since the manuscript's length has increased a lot with the analyses on the mock communities. Thus, we added only a few sentences on the reasons that the datasets were chosen. The main reason was that we wanted to use high quality hypothesis-driven public datasets. Also, please see Response to Reviewer's #2 comment #16.

#### **Reviewer's #2 comment #19**

*In the Declarations sections, "MOTU: Molecular Operational Taxonomic Unit (species equivalent for Eukaryotes)" and "OTU: Operational Taxonomic Unit (species equivalent for prokaryotes)" is not true. Often OTUs are clustered at levels below species-level such that multiple OTUs will assign to a single taxonomy for both prokaryotes and eukaryotes.*

We agree with the reviewer that OTUs can represent taxonomic levels below the species level. The declarations were rephrased.

#### **Reviewer's #2 comment #20**

*Captions for Figures 3-5 should be more detailed and indicate which gene is analyzed and which comparisons they are for. Additionally, Figure 4 is not discussed in the text at all.*

The captions of Figures mentioned were explained further as suggested. Figure 4 is now discussed in the text.

#### **Reviewer's #2 comment #21**

*The use of citations within the text such as in the following sentence is unconventional and inappropriate. Typically, the last name of the first author is used followed by the numbered citations.*

*a. Lines 175-177: "For the 16S rRNA marker gene, the dataset reported by study [30] was used while for the COI case, the one of [31] (accession numbers: PRJEB20211 and PRJEB13009 respectively)."*

*b. Lines 196-197: "Regarding the creation of the MOTU table, [31] used VSEARCH [10] with a clustering at 97% similarity threshold."*

In the first place, we followed the instructions of the journal in formatting the references and the citations (see: [https://academic.oup.com/gigascience/pages/instructions\\_to\\_authors](https://academic.oup.com/gigascience/pages/instructions_to_authors)). Hence, we used the square brackets. However, we agree with your point of view and we did the suggested changes.

## References

- [1] Kurtzer GM, Sochat V, Bauer MW. Singularity: Scientific containers for mobility of compute. *PLoS one*. 2017 May 11;12(5):e0177459.
- [2] Siegenthaler A, Wangenstein OS, Benvenuto C, Campos J, Mariani S. DNA metabarcoding unveils multiscale trophic variation in a widespread coastal opportunist. *Molecular ecology*. 2019 Jan;28(2):232-49.
